# Supplementary material for: Emergence of fractal geometries in the evolution of a metabolic enzyme
Source: PubMed Central journal article supplement (PMC11041685; doi:10.1038/s41586-024-07287-2), 2024-04-10
Supplement: 41586_2024_7287_MOESM1_ESM.pdf [file 41586_2024_7287_MOESM1_ESM.pdf]

**Supplementary information**

---

**Emergence of fractal geometries in the evolution of a metabolic enzyme**

---

In the format provided by the authors and unedited

This file contains:

**Supplementary Figure 1** | Uncropped SDS-PAGE Gel images and uncropped plates from survival assays

**Supplementary Figure 2** | SAXS scatter curves of extant and ancestral proteins at different protein concentrations

**Supplementary Figure 3** | Cryo-EM data collection and processing schemes for SeCS

**Supplementary Figure 4** | Cryo-EM data collection and processing schemes for  $\Delta 2-6$  SeCS

**Supplementary Figure 5** | Cryo-EM data collection and processing schemes H369R SeCS

**Supplementary Figure 6** | Full phylogenetic tree of CS in Cyanobacteria

**Supplementary Table 1** | Kinetic parameters for SeCS variants

**Supplementary Table 2** | List and sequences of DNA sequences of proteins used in this study

**Supplementary Table 3** | List and sequences of homology cassettes used for transformation of *S. elongatus* PCC7942

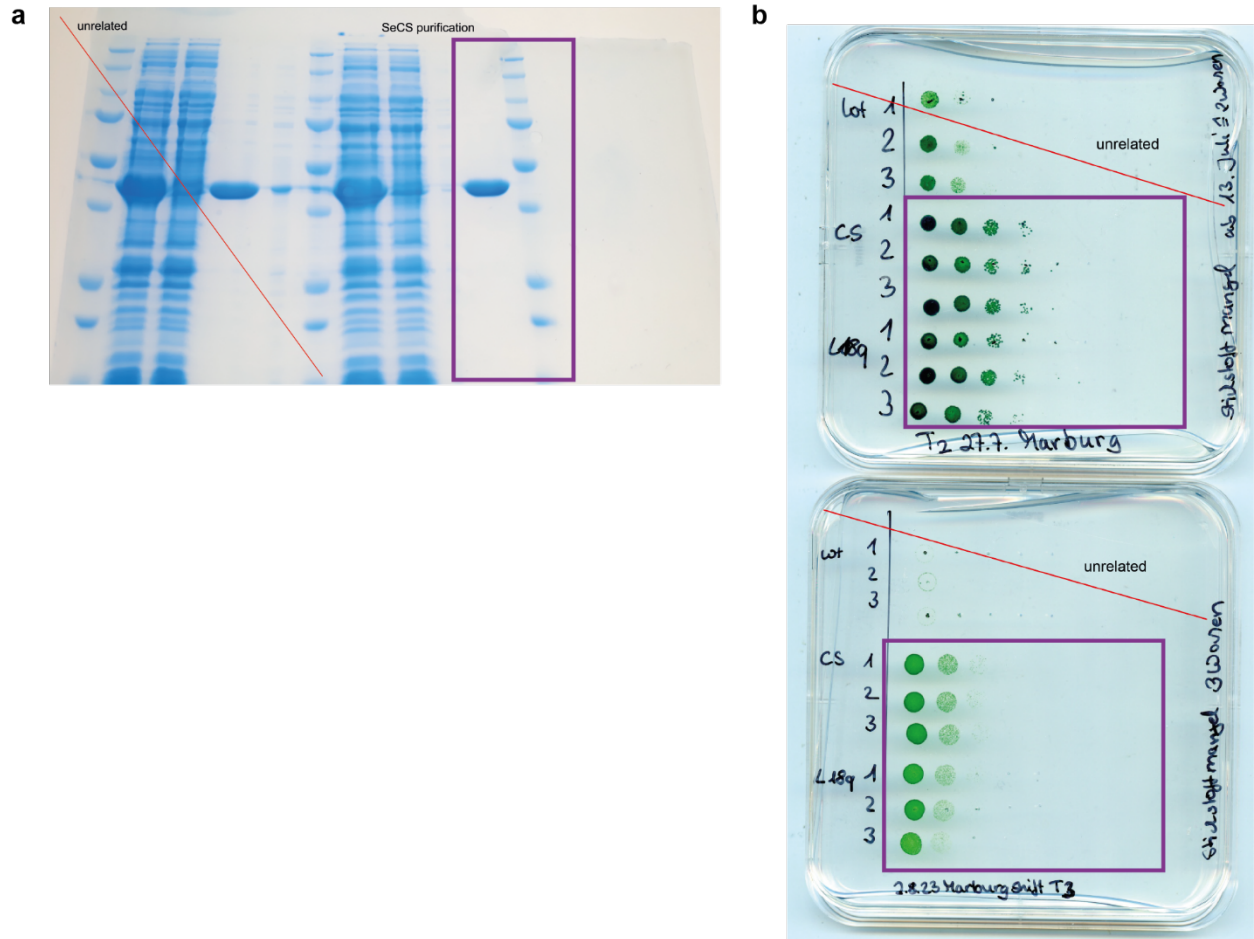

**Supplementary Fig. 1 Uncropped images (a)** SDS-PAGE of purified SeCS protein, see Extended Data Fig. 1a. **(b)** BG11-plates from survival assays of *S. elongatus* strains after extended nitrogen starvation, see Fig. 4f.

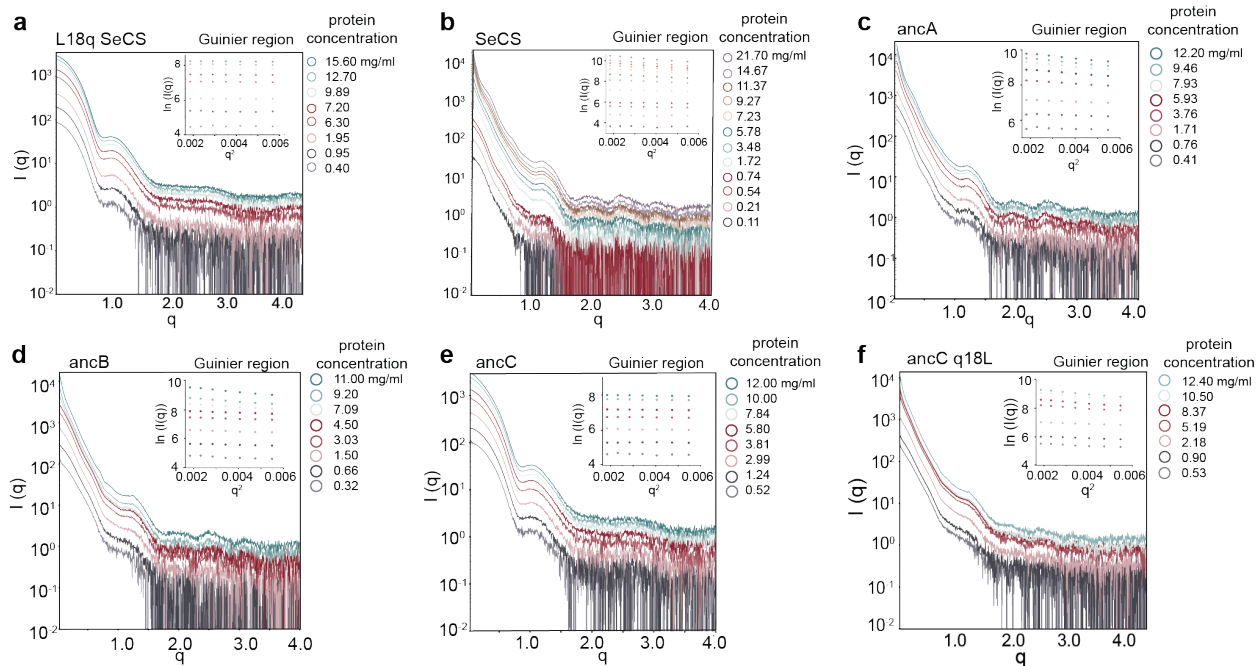

**Supplementary Fig. 2** SAXS Raw scattering curves from SAXS measurements underlying the  $R_g$  measurements from (a) L18q SeCS, (b) WT SeCS, (c) ancA, (d) ancB, (e) ancC and (f) ancC q18L at indicated protein concentrations.

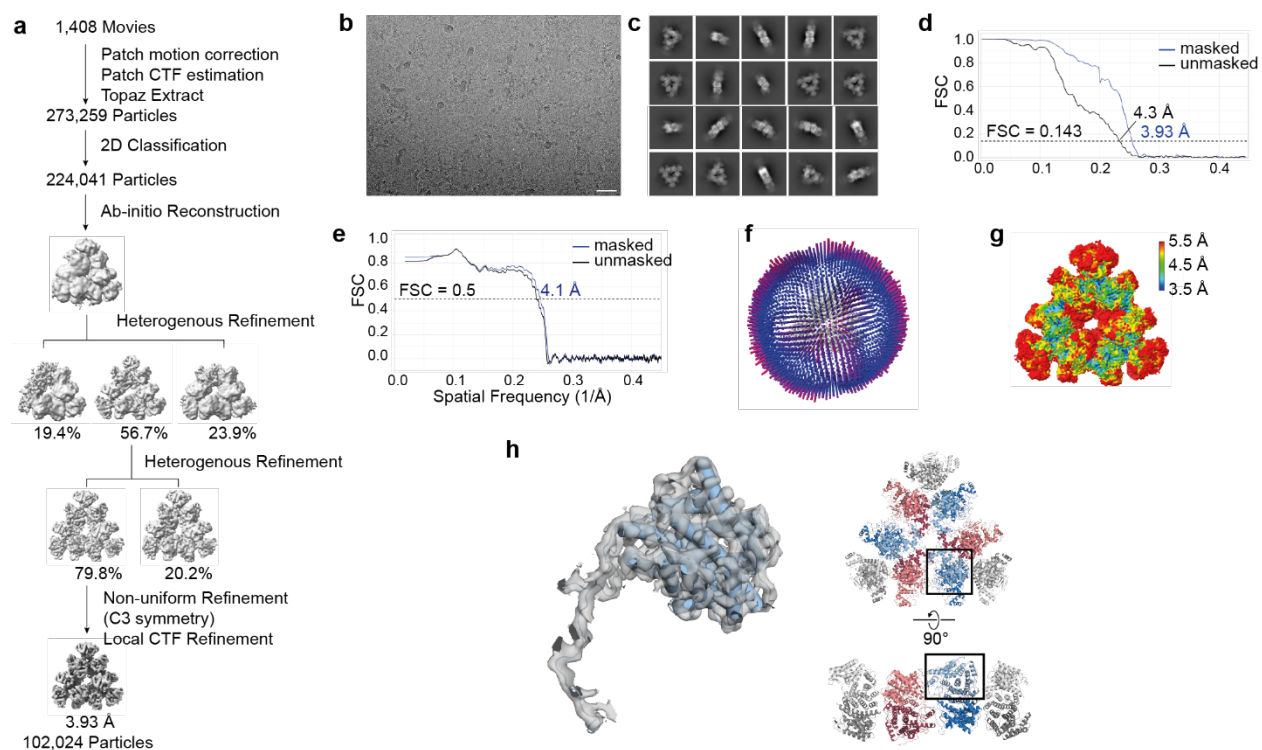

**Supplementary Fig. 3 CryoEM processing workflow for the 18mer SeCS** (a) An overview of the image processing procedure (see methods). (b) A representative micrograph of the SeCS (scale bar, 50 nm). 1,408 micrographs were collected in total. (c) Representative 2D class averages. (d) Fourier shell correlation (FSC) curves for the masked and unmasked reconstruction. (e) FSC curves for cross-validation between the summed modelling map and the final refined model with and without masking. (f) Euler angular distribution of particles used in the final 3D reconstruction. (g) Surface view of the local resolution of the reconstruction. (h) Cryo-EM density of a monomeric subunit forming the 18mer. The respective monomer is indicated in the full structure next to it.

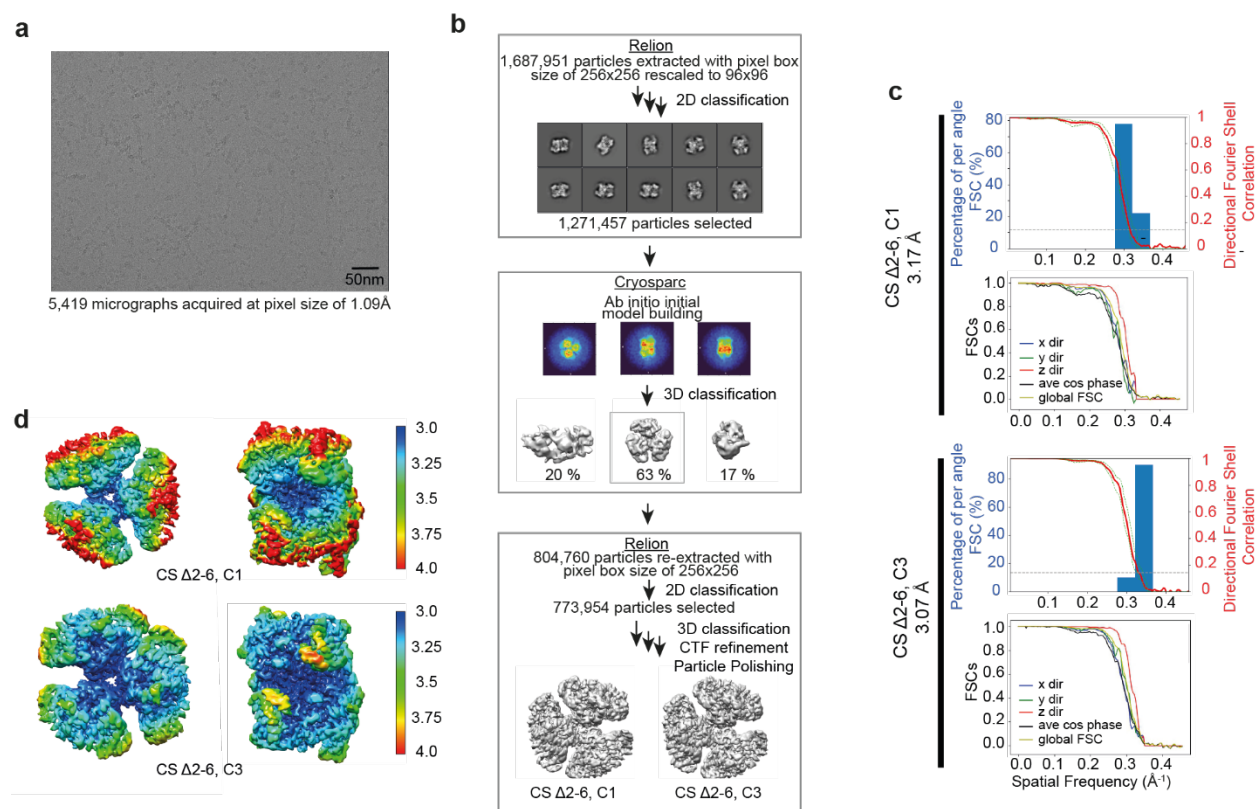

**Supplementary Fig. 4 CryoEM processing workflow for the  $\Delta 2-6$  SeCS** (a) Example micrograph acquired on a K3 detector (Gatan, 5760x4092 pixel) showing particle distribution on Quantifoil 2/1 grid-holes. 5,419 micrographs were collected in total. (b) Schematic of the image processing workflow. crYOLO-picked particles were extracted and subjected to 2D classification with RELION. Selected classes were used for ab initio model building and 3D-classification in Cryosparc. Particles belonging to the 3D class reflecting 2D classification results were refined, subjected to Bayesian polishing and post-processed in RELION, once with C1 and once with C3 symmetry. (c) Plots showing the global and directional resolution for the densities obtained in (b), calculated using the “Remote 3DFSC Processing Server” web interface. For  $\Delta 2-6$  C1 and C3 a sphericity score of 0.978 and 0.977 and a global resolution (FSC-threshold = 0.143) of 3.17 Å and of 3.07 Å was calculated, respectively. (d) Local resolution as calculated by RELION mapped on the refined densities (left: top view, right: side view).

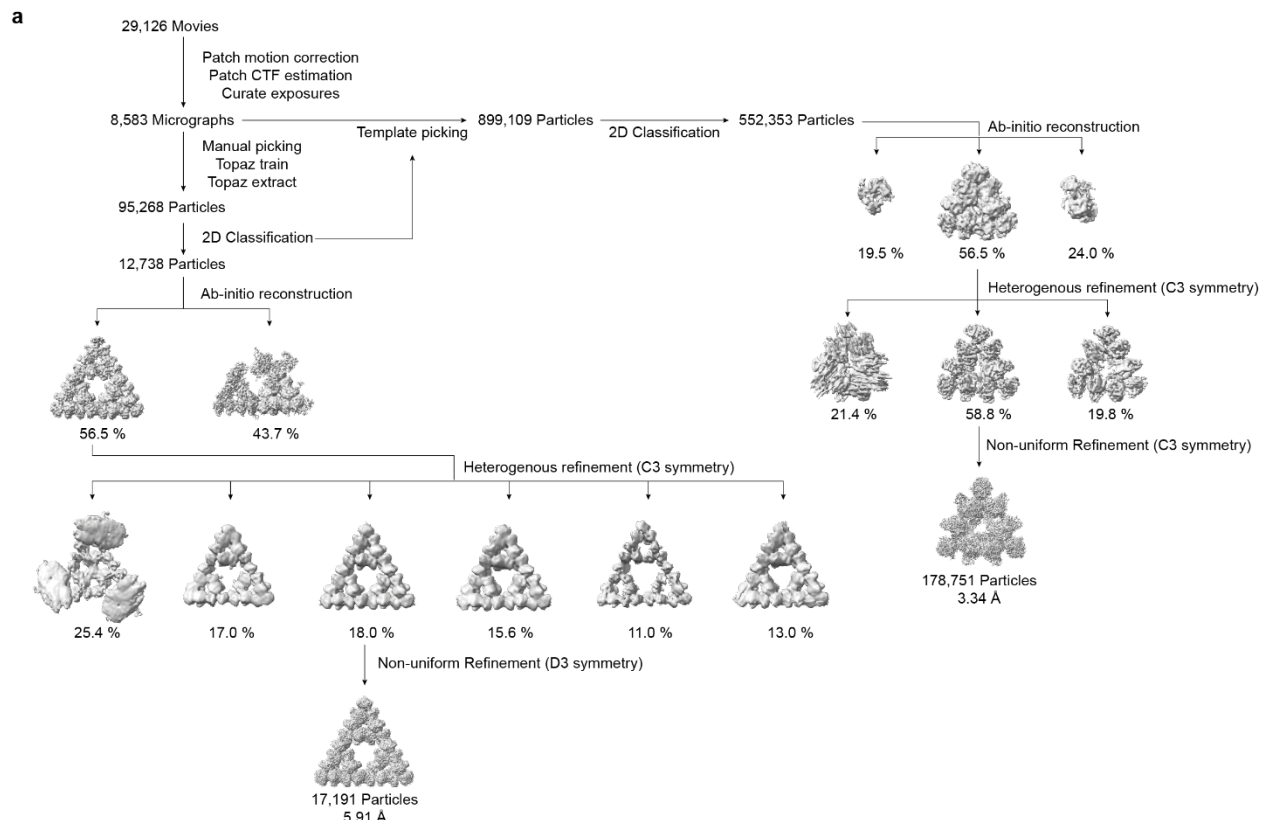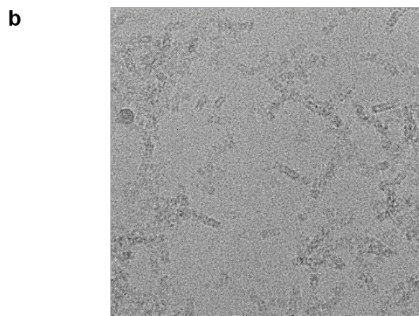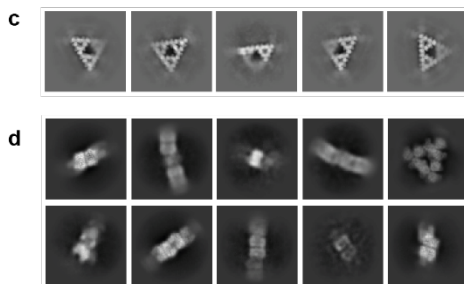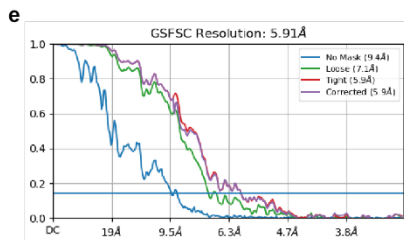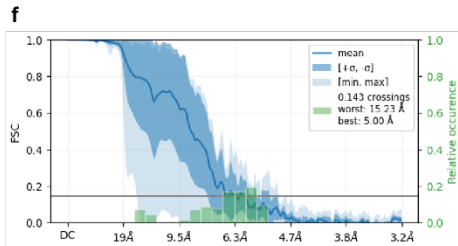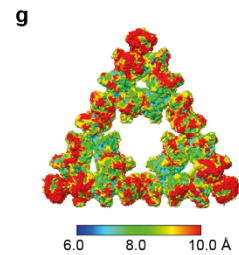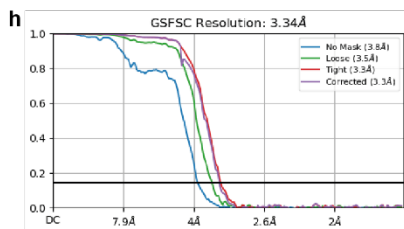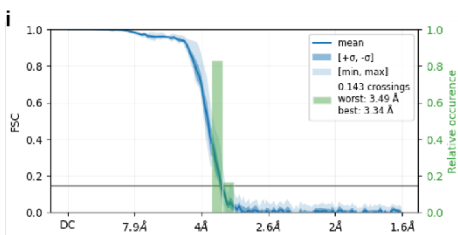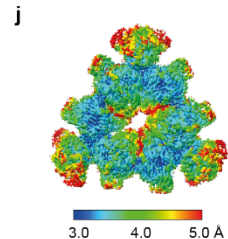

**Supplementary Fig. 5 CryoEM processing workflow for H369R SeCS 18mer and 54mer**

(a) An overview of the image processing procedure (see Methods). (b) A representative micrograph of the SeCS 54mer acquired from Thermo Scientific Krios G4 (scale bar, 50 nm). 29,126 micrographs were collected in total. (c) Representative 2D classes of 54mer and (d) 18mer. (e) Fourier shell correlation (FSC) curves for the reconstruction of 54mer before and after applying various masks. (f) Conical FSC curves of particles used in the final 54mer 3D reconstruction. (g) Density map of 54mer colored by local resolution. (h) FSC curve of 18mer before and after applying various masks. (i) Conical FSC curves of particles used in the final 18mer 3D reconstruction. (j) Density map of 18mer colored by local resolution.



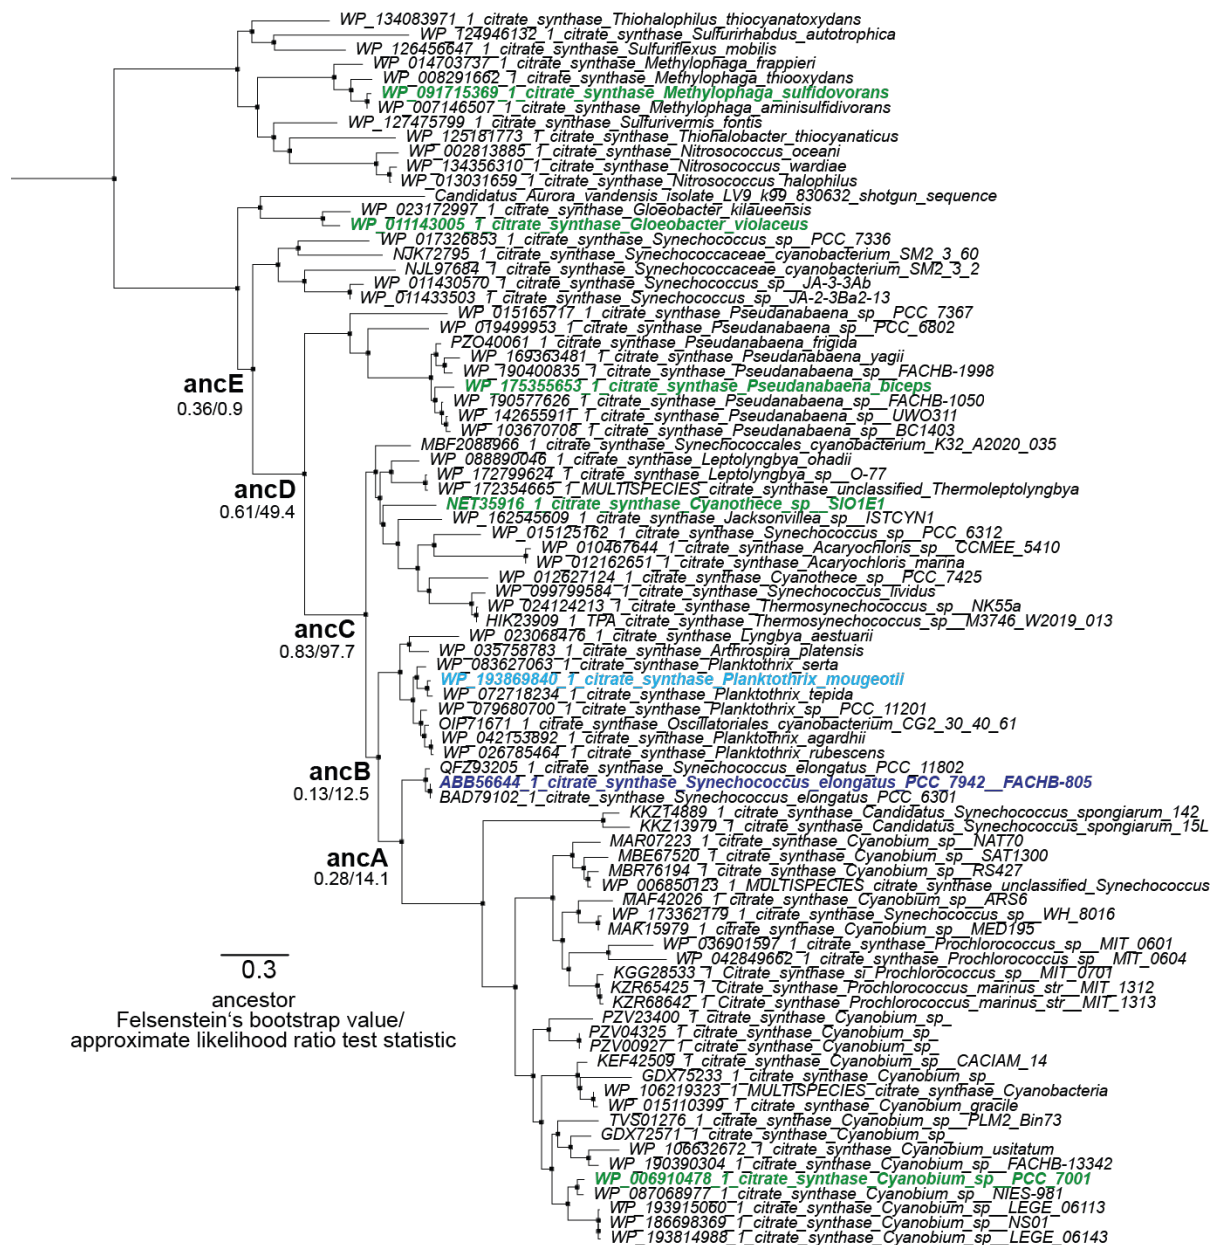

**Supplementary Fig. 6 Phylogenetic tree of CS in Cyanobacteria** Full tree with all sequences (organism name and NCBI-identifier) to infer the evolutionary history of SeCS. Extant sequences that were purified in vitro and analyzed regarding their assembly state are colored (blue and green). Resurrected nodes of the tree are indicated with corresponding Felsenstein's bootstrap values and approximate likelihood ratio test statistics.

**Supplementary Table 1 Kinetic characterization for citrate synthase variants**

|                  | <b>acetylCoA</b>          |                                 | <b>oxaloacetate</b>       |                                   |
|------------------|---------------------------|---------------------------------|---------------------------|-----------------------------------|
|                  | $K_{cat}$<br>( $s^{-1}$ ) | $K_m$ acetyl-CoA<br>( $\mu M$ ) | $K_{cat}$<br>( $s^{-1}$ ) | $K_m$ oxaloacetate<br>( $\mu M$ ) |
| <b>SeCS WT</b>   | $24.2 \pm 1.3$            | $91.8 \pm 9.2$                  | $19.5 \pm 1.7$            | $65.6 \pm 10.6$                   |
| <b>SeCS L18Q</b> | $21.7 \pm 1.0$            | $78.5 \pm 6.2$                  | $20.5 \pm 1.5$            | $57.2 \pm 7.8$                    |

Measurements were performed at 25 °C. N=3 biological replicates with 3 technical replicates each, errors = standard error of the mean

**Supplementary Table 2 List of DNA sequences of proteins used in this study**

| Protein<br>(Accession<br>number)                                                 | DNA sequence                                                                                                                                                                                                                                                                                                                                                                                                                                                                                                                                                                                                                                                                                                                                                                                                                                                                                                                                                                                                                                                                                                                                                                                                                                                                        |
|----------------------------------------------------------------------------------|-------------------------------------------------------------------------------------------------------------------------------------------------------------------------------------------------------------------------------------------------------------------------------------------------------------------------------------------------------------------------------------------------------------------------------------------------------------------------------------------------------------------------------------------------------------------------------------------------------------------------------------------------------------------------------------------------------------------------------------------------------------------------------------------------------------------------------------------------------------------------------------------------------------------------------------------------------------------------------------------------------------------------------------------------------------------------------------------------------------------------------------------------------------------------------------------------------------------------------------------------------------------------------------|
| <p><b>CS <i>S. elongatus</i><br/>PCC 7942</b></p> <p>GenBank:<br/>ABB56644.1</p> | <p>ATGACTGCCGTCAGCGAGTTTCGGCCCTGGCCTAGAAGGCGTGCCCGCCACACTCTCGAGCATTAGCTTTGT<br/>CGATGGCCAGCGCGGCGTCTAGAGTATCGCGGCATCAGCATCGAGCAACTGGCGCAACAGAGCAGTTTT<br/>CTGGAACCCGCTACCTGTTGATTTGGGGCCATCTACCAACTCAGCAGGAATTGACCAGATTCGAGCAGCA<br/>AATTCCGCTACCACCGCCGCATCAAGTTCGGCATCCGGGACATGATGAAATGCTTCCCCGATAGCGGCCATC<br/>CTATGGATGCCCTGCAGGCGAGCGCCGACGCCCTCGGGTTGTTCTATTCCGCGCGCGCTTGGATGATCC<br/>CGAATACATTCCGGGCGCCGTTGTGCGTTGTAGCCAAAATTCGACGATGGTGGCTGCCTCCAGCTGA<br/>TCCGCAAGGGTAACGACCCAATTCAGCCCCGGCATGAACTGGACTACGCCGCCAACTTTCTCTACATGCTG<br/>ACGGAGCGGAGCCCGATCCAGTCGCAGCTCGGATTTTTGATATTTGCCTCACCTGCACGCCGAACATAC<br/>GATCAACGCCTCGACCTTCTCGGCGATGGTACAGCTTCGACCTGACCGATCCCTACGCTGTCTGTTGCTT<br/>CTGCCGTTGGCACCTTGGCTGGCCCCCTCCATGGCGGCGCCAATGAAGAAGTGCTGGACATGCTGGAGGC<br/>GATCGGTTCCGTCGAGAATGTTGAGCCCTACCTCGACCACTGCATTGCCACCAAAACGCGCATTATGGGCT<br/>TTGGGACCCGTGCTACAAAGTCAAGGATCCGCGGGCAGTCATTCTGCAAAAATTCGGCCGAGCAACTGTT<br/>GATATCTTCGGCCATGATCCCTACTACGAAATCGCGGTGCGAGTCGAAAAGGCGAGCAGCCGAGCGACTCAG<br/>CCACAAGGGCATTACCCCAACGTCGATTTCTACTCCGGCTTGGTCTATCGCAAGCTCGGTATTCCTAGCGA<br/>TCTATTACACCCGTTGTTGCGATCGCGCGGTTGCGGGCTGGCTCGCCACTGGAAGAGCAGCTGAAC<br/>GAAAATCGGATCTTCGCCCCACTCAGATCTACACGGGCAGCCACAACCTCGACTACACCCCGATCGCCGA<br/>TCGGGATTTGGCGATCGAATCTGAT</p>     |
| <p><b>Δ2-5 CS <i>S.</i><br/><i>elongatus</i> PCC<br/>7942</b></p>                | <p>ATGGAGTTTCGGCCCTGGCCTAGAAGGCGTGCCCGCCACACTCTCGAGCATTAGCTTTGTGATGGCCAGCG<br/>CGGCGTCTAGAGTATCGCGGCATCAGCATCGAGCAACTGGCGCAACAGAGCAGTTTTCTGGAACCCGCT<br/>ACCTGTTGATTTGGGGCCATCTACCAACTCAGCAGGAATTGACCGAGTTCGAGCAGCAAAATTCGATACC<br/>GCCGCATCAAGTTCGGCATCCGGGACATGATGAAATGCTTCCCGATAGCGGCCATCCTATGGATGCCCTG<br/>CAGGCGAGCGCCGAGCCCTCGGGTTGTTCTATTCCGCGCGCGCTTGGATGATCCGGAATACATTCCGG<br/>CGGCCGTTGTGCGTTTGTAGCCAAAATTCGACGATGGTGGCTGCCTTCCAGCTGATCCGCAAGGGTAAC<br/>GACCAATTCAGCCCCGCGATGAACTGGACTACGCCCACTTTCTCTACATGCTGACGGAGCGCGAGCC<br/>CGATCCAGTCGCAGCTCGGATTTTTGATATTTGCCTCACCTGCACGCCGAACATACGATCAACGCCTCGAC<br/>CTTCTCGGCCGATGGTACAGCTTCGACCTGACCGATCCCTACGCTGTCTGTTGCTTGCCTTGGCACCT<br/>TGGCTGGCCCCCTCCATGGCGGCGCCAATGAAGAAGTGCTGGACATGCTGGAGGCGATCGGTTCCGTCGA<br/>GAATGTTGAGCCCTACCTCGACCACTGCATTGCCACCAAAACGCGCATTATGGGCTTTGGGACCCGTGCT<br/>ACAAAGTCAAGGATCCGCGGGCAGTCATTCTGCAAAAATTCGGCCGAGCAACTGTCGATATCTTCGGCCAT<br/>GATCCCTACTACGAAATCGCGGTGCGAGTCGAAAAGGCGAGCAGCCGAGCGACTCAGCCACAAGGGCATT<br/>ACCCCAACGTCGATTTCTACTCCGGCTTGGTCTATCGCAAGCTCGGTATTCCTAGCGATCTATTACACCCG<br/>TGTTGCGATCGCGCGGGTTGCGGGCTGGCTCGCCACTGGAAGAGCAGCTGAACGAAAATCGGATCTT<br/>CCGCCCCACTCAGATCTACACGGGCAGCCACAACCTCGACTACACCCCGATCGCCGATCGGGATTTGGCG<br/>ATCGAATCTGAT</p>                         |
| <p><b>Δ2-6 CS <i>S.</i><br/><i>elongatus</i> PCC<br/>7942</b></p>                | <p>ATGTTTCGGCCCTGGCCTAGAAGGCGTGCCCGCCACACTCTCGAGCATTAGCTTTGTGATGGCCAGCGCG<br/>GCGTCTAGAGTATCGCGGCATCAGCATCGAGCAACTGGCGCAACAGAGCAGTTTTCTGGAACCCGCTAC<br/>CTGTGTTGATTTGGGGCCATCTACCAACTCAGCAGGAATTGACCGAGTTCGAGCAGCAAAATTCGATACC<br/>CGCATCAAGTTCGGCATCCGGGACATGATGAAATGCTTCCCGATAGCGGCCATCCTATGGATGCCCTGC<br/>AGGCGAGCGCCGAGCCCTCGGGTTGTTCTATTCCGCGCGCGCCTTGGATGATCCCGAATACATTCCGGC<br/>GGCCGTTGTGCGTTTGTAGCCAAAATTCGACGATGGTGGCTGCCTTCCAGCTGATCCGCAAGGGTAACG<br/>ACCAATTCAGCCCCGCGATGAACTGGACTACGCCCACTTTCTCTACATGCTGACGGAGCGCGAGCCG<br/>GATCCAGTCGCAGCTCGGATTTTTGATATTTGCCTCACCTGCACGCCGAACATACGATCAACGCCTCGACC<br/>TTCTCGGCCGATGGTACAGCTTCGACCTGACCGATCCCTACGCTGTCTGTTGCTTGCCTGTTGGCACCT<br/>GGCTGGCCCCCTCCATGGCGGCGCCAATGAAGAAGTGCTGGACATGCTGGAGGCGATCGGTTCCGTCGAG<br/>AATGTTGAGCCCTACCTCGACCACTGCATTGCCACCAAAACGCGCATTATGGGCTTTGGGACCCGTGCTA<br/>CAAAGTCAAGGATCCGCGGGCAGTCATTCTGCAAAAATTCGGCCGAGCAACTGTTGATATCTTCGGCCATG<br/>ATCCCTACTACGAAATCGCGGTGCGAGTCGAAAAGGCGAGCAGCCGAGCGACTCAGCCACAAGGGCATTAC<br/>CCCAACGTCGATTTCTACTCCGGCTTGGTCTATCGCAAGCTCGGTATTCCTAGCGATCTATTACACCCGGT<br/>TTTGCGATCGCGCGGGTTGCGGGCTGGCTCGCCACTGGAAGAGCAGCTGAACGAAAATCGGATCTTCC<br/>GCCCCACTCAGATCTACACGGGCAGCCACAACCTCGACTACACCCCGATCGCCGATCGGGATTTGGCGATC<br/>GAATCTGAT</p>                         |
| <p><b>E5A CS <i>S.</i><br/><i>elongatus</i> PCC<br/>7942</b></p>                 | <p>ATGACTGCCGTCAGCGCATTTCGGCCCTGGCCTAGAAGGCGTGCCCGCCACACTCTCGAGCATTAGCTTTGT<br/>CGATGGCCAGCGCGGCGTCTAGAGTATCGCGGCATCAGCATCGAGCAACTGGCGCAACAGAGCAGTTTT<br/>CTGGAACCCGCTACCTGTTGATTTGGGGCCATCTACCAACTCAGCAGGAATTGACCGAGTTCGAGCAGCA<br/>AATTCCGCTACCACCGCCGCATCAAGTTCGGCATCCGGGACATGATGAAATGCTTCCCCGATAGCGGCCATC<br/>CTATGGATGCCCTGCAGGCGAGCGCCGACGCCCTCGGGTTGTTCTATTCCGCGCGCGCCTTGGATGATCC<br/>CGAATACATTCCGGGCGCCGTTGTGCGTTTGTAGCCAAAATTCGACGATGGTGGCTGCCTCCAGCTGA<br/>TCCGCAAGGGTAACGACCCAATTCAGCCCCGGCATGAACTGGACTACGCCGCCAACTTTCTCTACATGCTG<br/>ACGGAGCGGAGCCCGATCCAGTCGCAGCTCGGATTTTTGATATTTGCCTCACCTGCACGCCGAACATAC<br/>GATCAACGCCTCGACCTTCTCGGCCGATGGTACAGCTTCGACCTGACCGATCCCTACGCTGTCTGTTGCTT<br/>CTGCCGTTGGCACCTTGGCTGGCCCCCTCCATGGCGGCGCCAATGAAGAAGTGCTGGACATGCTGGAGGC<br/>GATCGGTTCCGTCGAGAATGTTGAGCCCTACCTCGACCACTGCATTGCCACCAAAACGCGCATTATGGGCT<br/>TTGGGACCCGTGCTACAAAGTCAAGGATCCGCGGGCAGTCATTCTGCAAAAATTCGGCCGAGCAACTGTT<br/>GATATCTTCGGCCATGATCCCTACTACGAAATCGCGGTGCGAGTCGAAAAGGCGAGCAGCCGAGCGACTCAG<br/>CCACAAGGGCATTACCCCAACGTCGATTTCTACTCCGGCTTGGTCTATCGCAAGCTCGGTATTCCTAGCGA<br/>TCTATTACACCCGTTGTTGCGATCGCGCGGGTTGCGGGCTGGCTCGCCACTGGAAGAGCAGCTGAAC<br/>GAAAATCGGATCTTCGCCCCACTCAGATCTACACGGGCAGCCACAACCTCGACTACACCCCGATCGCCGA<br/>TCGGGATTTGGCGATCGAATCTGAT</p> |

|                                                                                                               |                                                                                                                                                                                                                                                                                                                                                                                                                                                                                                                                                                                                                                                                                                                                                                                                                                                                                                                                                                                                                                                                                                                                                                                                                                                                                     |
|---------------------------------------------------------------------------------------------------------------|-------------------------------------------------------------------------------------------------------------------------------------------------------------------------------------------------------------------------------------------------------------------------------------------------------------------------------------------------------------------------------------------------------------------------------------------------------------------------------------------------------------------------------------------------------------------------------------------------------------------------------------------------------------------------------------------------------------------------------------------------------------------------------------------------------------------------------------------------------------------------------------------------------------------------------------------------------------------------------------------------------------------------------------------------------------------------------------------------------------------------------------------------------------------------------------------------------------------------------------------------------------------------------------|
| <p>L18Q CS <i>S. elongatus</i> PCC 7942</p>                                                                   | <p>ATGACTGCCGTCAGCGAGTTTCGGCCCTGGCCTAGAAGGCGTGCCCGCCACACAGTCGAGCATTAGCTTTGT<br/>CGATGGCCAGCGCGGCGTCTAGAGTATCGCGGCATCAGCATCGAGCAACTGGCGCAACAGAGCAGTTTT<br/>CTGGAAACCCTACCTGTTGATTTGGGGCCATCTACCAACTCAGCAGGAATTGACCGAGTTTCGAGCAGCA<br/>AATTCGCTACCACCGCCGCATCAAGTTCGGCATCCGGGACATGATGAAATGCTTCCCGGATAGCGGCCATC<br/>CTATGGATGCCCTGCAGGCGAGCGCCGACGCCCTCGGGTTGTTCTATTCCGGCGCGCCTTGGATGATCC<br/>CGAATACATTTCGGGGCGCCGTTGTGCGTTTGTAGCCAAAATTCGACGATGGTGGCTGCCTCCAGCTGA<br/>TCCGCAAGGGTAACGACCCAATTACGCCCGCGCATGAACTGGACTACGCCGCCAACTTTCTACATGCTG<br/>ACGGAGCGCGAGCCCGATCCAGTCGACGCTCGGATTTTTGATATTTGCCTCACCTGCACGCCGAACATAC<br/>GATCAACGCCTCGACCTTCTCGGCGATGGTACAGCTTCGACCCTGACCGATCCCTACGCTGTCGTTGCTT<br/>CTGCCGTTGGCACCTTGGCTGGCCCCCTCCATGGCGGCGCAATGAAGAAGTGTCTGGACATGCTGGAGGC<br/>GATCGGTTCCGTCGAGAATGTTGAGCCCTACCTCGACCACTGCATTGCCACCAAAACGCGCATTATGGGCT<br/>TTGGGCACCGTGTCTACAAAGTCAAGGATCCGCGGGCAGTCACTTCTGCAAAAATTCGGCCGAGCAACTGTT<br/>GATATCTTCGGCCATGATCCCTACTACGAAATCGCGGTGCGAGTCGAAAAGGCAGCAGCCGAGCGACTCAG<br/>CCACAAGGGCATTACCCCAACGTCGATTTCTACTCCGGCTTGGTCTATCGCAAGCTCGGTATTCTAGCGA<br/>TCTATTACACCGGTGTTTTCGATCGCGCGGGTTCGGGGCTGGCTCGCCCACTGGAAGAGAGCAGCTGAAC<br/>GAAAATCGGATCTTCGCCCCCACTAGATCTACACGGGCAGCCACAACCTCGACTACACCCCGATCGCCGA<br/>TCGGGATTTGGCGATCGAATCTGAT</p> |
| <p>H369R CS <i>S. elongatus</i> PCC 7942</p>                                                                  | <p>ATGACTGCCGTCAGCGAGTTTCGGCCCTGGCCTAGAAGGCGTGCCCGCCACACTCTCGAGCATTAGCTTTGT<br/>CGATGGCCAGCGCGGCGTCTAGAGTATCGCGGCATCAGCATCGAGCAACTGGCGCAACAGAGCAGTTTT<br/>CTGGAAACCCTACCTGTTGATTTGGGGCCATCTACCAACTCAGCAGGAATTGACCGAGTTTCGAGCAGCA<br/>AATTCGCTACCACCGCCGCATCAAGTTCGGCATCCGGGACATGATGAAATGCTTCCCGGATAGCGGCCATC<br/>CTATGGATGCCCTGCAGGCGAGCGCCGACGCCCTCGGGTTGTTCTATTCCGGCGCGCCTTGGATGATCC<br/>CGAATACATTTCGGGGCGCCGTTGTGCGTTTGTAGCCAAAATTCGACGATGGTGGCTGCCTCCAGCTGA<br/>TCCGCAAGGGTAACGACCCAATTACGCCCGCGCATGAACTGGACTACGCCGCCAACTTTCTACATGCTG<br/>ACGGAGCGCGAGCCCGATCCAGTCGACGCTCGGATTTTTGATATTTGCCTCACCTGCACGCCGAACATAC<br/>GATCAACGCCTCGACCTTCTCGGCGATGGTACAGCTTCGACCCTGACCGATCCCTACGCTGTCGTTGCTT<br/>CTGCCGTTGGCACCTTGGCTGGCCCCCTCCATGGCGGCGCAATGAAGAAGTGTCTGGACATGCTGGAGGC<br/>GATCGGTTCCGTCGAGAATGTTGAGCCCTACCTCGACCACTGCATTGCCACCAAAACGCGCATTATGGGCT<br/>TTGGGCACCGTGTCTACAAAGTCAAGGATCCGCGGGCAGTCACTTCTGCAAAAATTCGGCCGAGCAACTGTT<br/>GATATCTTCGGCCATGATCCCTACTACGAAATCGCGGTGCGAGTCGAAAAGGCAGCAGCCGAGCGACTCAG<br/>CCACAAGGGCATTACCCCAACGTCGATTTCTACTCCGGCTTGGTCTATCGCAAGCTCGGTATTCTAGCGA<br/>TCTATTACACCGGTGTTTTCGATCGCGCGGGTTCGGGGCTGGCTCGCCCACTGGAAGAGAGCAGCTGAAC<br/>GAAAATCGGATCTTCGCCCCCACTAGATCTACACGGGCAGCCACAACCTCGACTACACCCCGATCGCCGA<br/>TCGGGATTTGGCGATCGAATCTGAT</p> |
| <p>Cys4 CS <i>S. elongatus</i> PCC 7942</p>                                                                   | <p>ATGACTGCCGTCAGCGAGTTTCGGCCCTGGCCTAGAAGGCGTGCCCGCCACACTCTCGAGCATTAGCTTTGT<br/>CGATGGCCAGCGCGGCGTCTAGAGTATCGCGGCATCAGCATCGAGCAACTGGCGCAACAGAGCAGTTTT<br/>CTGGAAACCCTACCTGTTGATTTGGGGCCATCTACCAACTCAGCAGGAATTGACCGAGTTTCGAGCAGCA<br/>AATTCGCTACCACCGCCGCATCAAGTTCGGCATCCGGGACATGATGAAATGCTTCCCGGATAGCGGCCATC<br/>CTATGGATGCCCTGCAGGCGAGCGCCGACGCCCTCGGGTTGTTCTATTCCGGCGCGCCTTGGATGATCC<br/>CGAATACATTTCGGGGCGCCGTTGTGCGTTTGTAGCCAAAATTCGACGATGGTGGCTGCCTCCAGCTGA<br/>TCCGCAAGGGTAACGACCCAATTACGCCCGCGCATGAACTGGACTACGCCGCCAACTTTCTACATGCTG<br/>ACGGAGCGCGAGCCCGATCCAGTCGACGCTCGGATTTTTGATATTTGCCTCACCTGCACGCCGAACATAC<br/>GATCAACGCCTCGACCTTCTCGGCGATGGTACAGCTTCGACCCTGACCGATCCCTACGCTGTCGTTGCTT<br/>CTGCCGTTGGCACCTTGGCTGGCCCCCTCCATGGCGGCGCAATGAAGAAGTGTCTGGACATGCTGGAGGC<br/>GATCGGTTCCGTCGAGAATGTTGAGCCCTACCTCGACCACTGCATTGCCACCAAAACGCGCATTATGGGCT<br/>TTGGGCACCGTGTCTACAAAGTCAAGGATCCGCGGGCAGTCACTTCTGCAAAAATTCGGCCGAGCAACTGTT<br/>GATATCTTCGGCCATGATCCCTACTACGAAATCGCGGTGCGAGTCGAAAAGGCAGCAGCCGAGCGACTCAG<br/>CCACAAGGGCATTACCCCAACGTCGATTTCTACTCCGGCTTGGTCTATCGCAAGCTCGGTATTCTAGCGA<br/>TCTATTACACCGGTGTTTTCGATCGCGCGGGTTCGGGGCTGGCTCGCCCACTGGAAGAGAGCAGCTGAAC<br/>GAAAATCGGATCTTCGCCCCCACTAGATCTACACGGGCAGCCACAACCTCGACTACACCCCGATCGCCGA<br/>TCGGGATTTGGCGATCGAATCTGAT</p> |
| <p>CS<br/><i>Synechocystis</i><br/>PCC 6803<br/><br/>NCBI Reference<br/>Sequence:<br/>WP_010873488<br/>.1</p> | <p>ATGAATTATGATGACTGATAACGAAGTGTAAAGAAGGCGTAGCCGGAGTCCCGCGCTAAATCGAGG<br/>GTGAGCCATGGATGGCAGCCGAGGATTTTGGAGTACCGGGCATTTCGCATCGAAGAATTAGCCAAATC<br/>CAGTAGTTTTATCGAAGTAGCCTATCTGCTCATCTGGGGTAAATGCCACCCAGGCAGAGATCGAAGATT<br/>TGAGTACGAAATTCGCACCCATCGACGATTAAGTACCACATCCGGGACATGATGAAATGTTTCCCGGAAAC<br/>AGGGCACCCCATGGATGCTTCAAACTTCAGCGGCGGCCCTTGGGATTTGTTCTGCTGACCGCCCTTGG<br/>ATGACCCCAATATATCCGGGCGCGGTGGTGCCTGTTAGCCAAAATCCCCACCATGGTGGCAGCTTTC<br/>CACATGATCCGGGAGGGTAACGATCCCATTCAGCCCAATGATAAATTTGGATTACGCTTCCAATCTCTTAC<br/>ATGCTGACGGAGAAGGAGCCAGACCCCTTGGCCGCAAAAGTGTGGATGTTGTTGACCCCTCCATGCTGA<br/>GCACACCATGAATGCGTCCACCTTTTCGGCCCGGTAACGGCTTCTACTCTACGGATCCCTATGCAGTGG<br/>TTGCCTCGGCGGTGGGGACTTTGGCGGGGCGCTCCACGGGGGAGCCAACGAAGAAGTGTAAATATGCT<br/>TGAAGAATTGGCTCAGTGAATAATGTCCGCCCTACGTGGAATAATGCTGGCCCAACAAACAGCGCATCA<br/>TGGGCTTTGGCCACCGAGTTTATAAAGTCAAAGACCCCGGGCAATTTTTGCAGGATTTGGCTGAACAGT<br/>TATTTGCCAAAATGGGCCAGCAGCAATATACGAAATCGCAGTGGAGTTGGAAGAAAGTGTGGAAGAATACG<br/>TGGGTCAAAGGGCATTACCCCAATGTGGACTTCTATTCCGGTTTGGTTACCGCAAGCTAGACATCCCGG<br/>CCGATCTGTTACGCCCTATTTGCGATCGCCAGGGTGGCGGGTGGTTGGCCCACTGGAAGGACAAATTA<br/>TCAGTCAATAAAATTTACCGCTACCCAAATTTACATCGGTGACCAATTTATCTTATGTTCCCATGACAGA<br/>ACGGGTAGTTTCCGTGGCCGCAATGAAGACCCCAATGCGATTATT</p>  |
| <p>ancA</p>                                                                                                   | <p>ATGACTGCCGTCAGCGAGTTTCGGCCCTGGCCTAGAAGGCGTGCCCGCCACACTCTCGAGCATTAGCTTTGT<br/>GACGGCAACCGCGGTGACTTGAATATCGTGGGATTTCCATCGAGCAACTGGCGCAACATCTCTTTTCTT<br/>GAGACTGCCTATTTACTGATCTGGGGCCATCTCCGACTCAAGAAGAGCTTACGGATTCGAGCATGAGATC<br/>CGTTATCATCGTCTGATTAATTTTCGCATCCGTGACATGATGAAATGTTTTCTGAGTCAGGGCACCCGATG<br/>GACGCTTTACAGGCTTCTGCTGCCGCTTTGGGACTTTTCTACTCTCGCCGCGCTTTGGACGACCCAGAA<br/>ATTCTGCGACGAGTTGTTGCTGTTAGTAAATCCCAAAATGGTCCGCGCATTTCAACTATTCTGATAAAG<br/>GAAATGATCCGATCCAGCCTCGCGACGACCTGGATTATGCCGCTAATTTCTATACATGCTTACAGAACGCG<br/>AGCCGACCCCTTTCGCCGACGATCTTTGACGCTGCTTACCCTTACGCTGAACACACTATTAAACGCAT<br/>CTACCTTTTCAGCCATGGTTACAGCATCCACTTACAGACCCTTATGCCGTAGTGGCTTCAGCCGTCGGGA<br/>CGCTTGGCCGCCATTGCACGGTGGGGCTAATGAGGAAGTCTTGCATGCTGGAAGAGATTGGTAGCGTC<br/>GAAAATGTTGAGCCGATTTAGATCATTGCATTGCAAGAAAACCAAGATTATGGGCTTCGGTACCCGCGTA<br/>TATAAAGTAAAGATCCAGCTGTAATCTTCGAGAACCTTCGGAGCAACTTTGATAAATTTGGTCAGC<br/>ATCCGACTATGAAATTTGCCGTAGCCTTAGAGAAGGCCGCGCGGAGCGTCTGGGACATAAAGGCTCAT</p>                                                                                                                                                                                                                                                                            |

|                         |                                                                                                                                                                                                                                                                                                                                                                                                                                                                                                                                                                                                                                                                                                                                                                                                                                                                                                                                                                                                                                                                                                                                                                                            |
|-------------------------|--------------------------------------------------------------------------------------------------------------------------------------------------------------------------------------------------------------------------------------------------------------------------------------------------------------------------------------------------------------------------------------------------------------------------------------------------------------------------------------------------------------------------------------------------------------------------------------------------------------------------------------------------------------------------------------------------------------------------------------------------------------------------------------------------------------------------------------------------------------------------------------------------------------------------------------------------------------------------------------------------------------------------------------------------------------------------------------------------------------------------------------------------------------------------------------------|
|                         | CCAAACGTTGATTTTTATTCTGGGCTTGATCGCAAATAGGAATCCCGTCCGACCTTTTACTCCGGTCTCGCAATCGCGCGTGTGCCGGTGGCTGGCACACTGAAAAGAGCAGTTGAATGAGAACCGTATTTCCCGCCTACACAAATCTACACAGGTAGCCATAATCTGAATTATGTCCCGATCGAGGAACGCGATTTGGCGATCGAATCTGAT                                                                                                                                                                                                                                                                                                                                                                                                                                                                                                                                                                                                                                                                                                                                                                                                                                                                                                                                                                      |
| <b>ancA L18q</b>        | ATGACTGCCGTATCCGAGTTTCCTCCAGGGCTTGAGGGAGTACCTGCAACTCAGAGCTCGATCAGTTTTGTGGACGGGCAACGCGGTGACTTGAATATCGTGGGATTTCCATCGAGCAACTGGCGCAACATTCTTCTTTTCTTGAGACTGCCTATTTACTGATCTGGGGCCATCTCCGACTCAAGAAGAGCTTACGGAGTTCGAGCATGAGATCCGTTATCATCGTCGTATTAATTTCCGATCCGTGACATGATGAAATGTTTTCTGAGTCAGGGCACCCGATGGACGCTTACAGGCTTCTGCTGCCGCTTTGGGACTTTTCTACTCTCGCCGCGCTTTGGACGACCCAGAATAATTCTGTCAGCAGTTGTTGCTGTAGCTAAAATCCCAACAATGGTCGCGGCATTCCAACCTATTGCTAAAAGAAATGATCCGATCCAGCCTCGCAGCAGCTGGATTATGCCGTAATTTCTTATACATGCTTACAGAACGCAGGCCGACCCCTTGGCCGACGCATCTTTGACGCTGTCTTACCCTTACGCTGAACACACTATTAACGCACTTACCTTTTACGCCATGGTTACAGCATCCACTCTTACAGACCCTTATGCCGTAGTGGCTTACGCCGTCGGACGCTTGGCCGCCATTGCACGGTGGGGCTAATGAGGAAGTCTTGACATGCTGGAAGAGATTGGTAGCGTCGAAAATGTTGAGCCGATTTAGATCATTGCATTGCAAAGAAAACCAAGATTATGGGCTTCGGTCCGACCCGCTATATAAAGTAAAAGATCCAGTCCAGTGTAACTTTCGAGAACCCTTCCGAGCAACTGTTGATAAATTTGGTACGATCCGTAATGAAATTTGCCGTAGCCTTAGAGAAGGCCGCGGCCGAGCGTCTGGGACATAAGGGCATCTATCCAAACGTTGATTTTTATTCTGGGCTTGATCGCAAATAGGAATCCCGTCCGACCTTTTACTCCGGCTTTCGCAATCGCGCGTGTGGCCGGTGGCTGGCACACTGGAAGAGCAGTTGAATGAGAAGCAACTTTTCCGCCCTACACAAATCTACACAGGTAGCCATAATCTGAATTATGTCCCGATCGAGGAACGCGATTTGGCGATCGAATCTGAT               |
| <b>Altall ancA</b>      | ATGACAGCGGTTTCGGAATTCGGTCCAGTCTTGAGGGAGTTCAGCGACGCAGTCCATTTTCTACGATGATGGACAAAAGGGTATCTTAGAATATCGCGGGATCAGCATCGAACAGCTGGCACAGCAATCCTCATTCCCTGAAACCGCCTACCTTTAATTTGGGGTAAACTTCCAACGCAACAGGAGCTGGCAGAGTTTGAACACGAAATTCGTTACCACCGTCGCATCAAGTTCGGTATCCGTGATGATGAAATGTTTCCCGATTCTGGGCACCCCATGATGCACTTACAGGCTTACGCCGCGCGCTTTGGCCTTTTTTACAGTCGTCGCGCTTTCGACGCCGGAATACTTCTGTCAGCCGTTGTGCGCTGCTGGCCAAAGATCCCACTATGGTTGCCGCAATTCAGTTAATCCGCAAGGGTAAATGATCCGATCCAGCCAGTGTGATCTGGATTACGCTGCGAACTTTCTTACATGTTAACAGAGC GTGAGCCAGATCCTCTGGCTGCCGCTATTTTCGATGTTTGTAACTTTGCACGCAGAACACACTATCAATGCAAGTACCTTTTACGCTATGGTTACGGCCTTACCCTGACCGATCCATATGCTGTGTCGAGCGTTCGAGTTGGACGCTGGCCGACCTTTCATGGGGGCGCAAATGAAGAGTACTTACAATGTTGAAGAGATTGGAAGTGTGAGAACGTTAGAGCCGTAATTTGGACCAGTGCATTGCACGCAAGGCCGCGCATCATGGGGTTCGGTCCACCGCGTGTACAAAGTAAAAGACCCCTCGTGTCTGTCATTCTTCAAGAACCTGGCTGAGCAACTTTTTGAGCGTTTTGTCACGACCCATATTACGACATCGCGTTAGCATTGGAACGTGCAGTCGCCGAACGCCTGGGCCACAAGGGATTTTACAAACGTCGACTTTTACTCAGGACTTGTGATCGCAAACCTGGTATCCCTTACAGACTATTTACACCCGTTTTCGCTATCGCACGTGTTGACAGGGTGGCTTGCCTTGAAGGAACAGTTATCAGAAAATCCGATTTTCGCCCCACGCAAATTTATACAGGTAGTCACAACATGGATTATACACCAATTGAGGAGCGTGATTTGGCGATCCGAATCTGAT           |
| <b>Altall ancA L18q</b> | ATGACAGCGGTTTCGGAATTCGGTCCAGTCTTGAGGGAGTTCAGCGACGCCTCTCATCCATTTCTACGATGATGGACAAAAGGGTATCTTAGAATATCGCGGGATCAGCATCGAACAGCTGGCACAGCAATCCTCATTCCCTGAAACCGCCTACCTTTAATTTGGGGTAAACTTCCAACGCAACAGGAGCTGGCAGAGTTTGAACACGAAATTCGTTACCACCGTCGCATCAAGTTCGGTATCCGTGATGATGAAATGTTTCCCGATTCTGGGCACCCCATGATGCACTTACAGGCTTACGCCGCGCGCTTTGGCCTTTTTTACAGTCGTCGCGCTTTCGACGCCGGAATACTTCTGTCAGCCGTTGTGCGCTGCTGGCCAAAGATCCCACTATGGTTGCCGCAATTCAGTTAATCCGCAAGGGTAAATGATCCGATCCAGCCAGTGTGATCTGGATTACGCTGCGAACTTTCTTACATGTTAACAGAGC GTGAGCCAGATCCTCTGGCTGCCGCTATTTTCGATGTTTGTAACTTTGCACGCAGAACACACTATCAATGCAAGTACCTTTTACGCTATGGTTACGGCCTTACCCTGACCGATCCATATGCTGTGTCGAGCTGACGCTGGACGCTGGCCGACCTTTCATGGGGGCGCAAATGAAGAGTACTTACAATGTTGGAAGAGATTGGAAGTGTGAGAACGTTAGAGCCGTAATTTGGACCAGTGCATTGCACGCAAGGCCGCGCATCATGGGGTTCGGTCCACCGCGTGTACAAAGTAAAAGACCCCTCGTGTCTGTCATTCTTCAAGAACCTGGCTGAGCAACTTTTTGAGCGTTTTGTCACGACCCATATTACGACATCGCGTTAGCATTGGAACGTGCAGTCGCCGAACGCCTGGGCCACAAGGGATTTTACAAACGTCGACTTTTACTCAGGACTTGTGATCGCAAACCTGGTATCCCTTACAGACTATTTACACCCGTTTTCGCTATCGCACGTGTTGACAGGGTGGCTTGCCTTGAAGGAACAGTTATCAGAAAATCCGATTTTCGCCCCACGCAAATTTATACAGGTAGTCACAACATGGATTATACACCAATTGAGGAGCGTGATTTGGCGATCCGAATCTGAT         |
| <b>ancB</b>             | ATGACGGCTGTCTCCGAGTTTAAAGCCTGGACTTGAGGGTGTGCCGCTACTCTGAGTTCATTTCTTCTCGTGACGGCCAGCGCGGATTTCTGGAATACCGTGGGATTAGTATTGAGCAATTAGCCCAACATTCGACATTTCTTGAGACAGCGTATTTACTGATTTGGGGTAAACTTCCACCCAAAGAGGAATTAGCAGAATTCGAACATGAAATTCGCTACCATCGCCGATCAAGTACCCTGATTTCTGTGATATGATGAAATGCTTCCAGAGTCAGGTCACCCAAATGATGCTTTGCAAGCCTCAGCAGCGGCTTTGGGGTGTCTTATTCCGCTCGTGCCTGGACGACCCGAGTACATCCGTGCGGCAAGTTGTGCGTTTACTGGCCAAAGATTCGACAATGGTTGCAGCATTCGAATTAAGCGCAAAGGAAACGACCCGTTACAACCGCGTGTGATCTGGATTATGCCGCTAACTTCTTGTACATGTTAAACGAAACGTGAGCCAGATCCGCTGGCCGACGCATCTTCGACGTATGCCTTACGCTGCATGCGGAACATACTATCAACGCCTCCACGTTTCTCGGCAATGGTAACGGCGTCTACTTTAACTGACCCTTACGCAGTAGTAGCATCGGCTGTAGGGACGTTAGCCGGCCGTTACATGGAGGTGCAAACGAGGAGGTTTTGACAATGTTGGAGGATTTGGCAGTGTGAGAACGTCGCTCCGTAATAGACCATTGTATCGCGAAAAAGGCCAAGATCATGGGGTTCGGACACC GCGTGTATAAAGTAAAGGATCCTCGTGCACAAATTTACAAAATTTAGCAGAGAGTATTTGAGAAAATTTGGTCACGATCAGTATTATGAAATCGCATGGAATAGAGCGTGTAGTCTGCTGAACGCTTGGTCAATAAAGGATTTATCCGAACGTCGATTTTTATTCTGGATTGGTATACCGTAAATAGGCATTCCATCGGATTTATTCACTCCG GTATTTGCCATCGCACGCGTGGCAGGTTGGTTGGCCCACTGGAAGAAACAATTTGCCGAAAATCGCATCTCCGTTCCAAACCCAAATTTACTGGATCACATAATGACTTACGTGCCAATCGAAGAACGTCGATTTGGCGATCGAATCTGAT |
| <b>ancB k8R</b>         | ATGACGGCTGTCTCCGAGTTTCCTCCGACTTGAGGGTGTGCCGCTACTCTGAGTTCATTTCTTCTCGTGACGGCCAGCGCGGATTTCTGGAATACCGTGGGATTAGTATTGAGCAATTAGCCCAACATTCGACATTTCTTGAGACAGCGTATTTACTGATTTGGGGTAAACTTCCACCCAAAGAGGAATTAGCAGAATTCGAACATGAAATTCGCTACCATCGCCGATCAAGTACCCTGATTTCTGTGATATGATGAAATGCTTCCAGAGTCAGGTCACCCAAATGATGCTTTGCAAGCCTCAGCAGCGGCTTTGGGGTGTCTTATTCCGCTCGTGCCTGGACGACCCGAGTACATCCGTGCGGCAAGTTGTGCGTTTACTGGCCAAAGATTCGACAATGGTTGCAGCATTCGAATTAAGCGCAAAGGAAACGACCCGTTACAACCGCGTGTGATCTGGATTATGCCGCTAACTTCTTGTACATGTTAAACGAAACGTGAGCCAGATCCGCTGGCCGACGCATCTTCGACGTATGCCTTACGCTGCATGCGGAACATACTATCAACGCCTCCACGTTTCTCGGCAATGGTAACGGCGTCTACTTTAACTGACCCTTACGCAGTAGTAGCATCGGCTGTAGGGACGTTAGCCGGCCGTTACATGGAGGTGCAAACGAGGAGGTTTTGACAATGTTGGAGGATTTGGCAGTGTGAGAACGTCGCTCCGTAATAGACCATTGTATCGCGAAAAAGGCCAAGATCATGGGGTTCGGACACC GCGTGTATAAAGTAAAGGATCCTCGTGCACAAATTTACAAAATTTAGCAGAGAGTATTTGAGAAAATTTGGTCACGATCAGTATTATGAAATCGCATGGAATAGAGCGTGTAGTCTGCTGAACGCTTGGTCAATAAAGGATTTATCCGAACGTCGATTTTTATTCTGGATTGGTATACCGTAAATAGGCATTCCATCGGATTTATTCACTCCG GTATTTGCCATCGCACGCGTGGCAGGTTGGTTGGCCCACTGGAAGAAACAATTTGCCGAAAATCGCATCTCCGTTCCAAACCCAAATTTACTGGATCACATAATGACTTACGTGCCAATCGAAGAACGTCGATTTGGCGATCGAATCTGAT    |

|                  |                                                                                                                                                                                                                                                                                                                                                                                                                                                                                                                                                                                                                                                                                                                                                                                                                                                                                                                                                                                                                                                                                                                                                                                                                                                                |
|------------------|----------------------------------------------------------------------------------------------------------------------------------------------------------------------------------------------------------------------------------------------------------------------------------------------------------------------------------------------------------------------------------------------------------------------------------------------------------------------------------------------------------------------------------------------------------------------------------------------------------------------------------------------------------------------------------------------------------------------------------------------------------------------------------------------------------------------------------------------------------------------------------------------------------------------------------------------------------------------------------------------------------------------------------------------------------------------------------------------------------------------------------------------------------------------------------------------------------------------------------------------------------------|
|                  | GGACGTTAGCCGGCCCCGTTACATGGAGGTGCAAACGAGGAGGTTTTGACAAATGTTGGAGGAGATTGGCAG<br>TGTTGAGAACGTCCTCGTACTTACAGCATTGTATCGCGAAAAAGGCCAAGATCATGGGGTTCGGACACC<br>GCGTGTATAAAGTAAAGGATCCTCGTGCACAAATTTACAAAAATTTAGCAGAGCAGTTATTTGAGAAATTTGG<br>TCACGATCAGTATTATGAAATCGCACTGGAATTAGAGCGTGTAGTCGCTGAACGCCCTGGTCATAAAGGGAT<br>TTATCCGAACGTCGATTTTTATTCTGGATTGGTATACCGTAAATTAGGCATTCCATCGGATTTATCACTCCG<br>GTATTTGCCATCGCACGCGTGGCAGGTTGGTTGGCCCACTGGAAGAACAATTTGCCAAAAATCGCATCTT<br>CCGTCCAACCCAAATTTATACTGGATCACATAATATGACTTACGTGCCAATCGAAGAACGTCGATTTGGCGAT<br>CGAATCTGAT                                                                                                                                                                                                                                                                                                                                                                                                                                                                                                                                                                                                                                                                                                    |
| ancB y80F        | ATGACGGCTGTCTCCGAGTTAAGCCTGGACTTGAGGGTGTGCCCGCTACTCTGAGTTCTATTTCTTCTCGT<br>GACGGCCAGCGCGGGATTCTGGAATACCGTGGGATTAGTATTAGCAATTAGCCCAACATTTCGACATTTCTT<br>GAGACAGCGTATTTACTGATTTGGGGTAAACTTCCACCCAAGAGGAATTAGCAGAATTCGAACATGAAATT<br>CGCTACCATCGCCGATCAAGTTCGATTCGATGATGATGAAGTGCCTCCAGAGTCAGGTCACCCAATG<br>GATGCTTTGCAAGCCTCAGCAGCGGCCTTGGGGTGTCTATTTCGCGTGTGCCTGGACGACCCCGAGTA<br>CATCCGTGCGGCAGTTGTGCGTTTACTGGCCAAGATTCCGACAAATGGTTCAGCATTCCAACTTATGCGCAA<br>AGGAAACGACCCGGTACAACCCGCTGATGATCTGGATTATCGCGCTAACTTCTGTACATGTTAAACGAACG<br>TGAGCCAGATCCGCTGGCCGCACGCATCTTCGACGTATGCTTACGCTGCATGCGGAACATACTATCAACG<br>CCTCCACGTTCTCGGCAATGGTAACGGCGTCTACTTTAACTGACCCTTACGCAGTAGTAGCATCGGCTGTAG<br>GGACGTTAGCCGGCCCCGTTACATGGAGGTGCAAACGAGGAGGTTTTGACAAATGTTGGAGGAGATTGGCAG<br>TGTTGAGAACGTCGCTCCGTAAGCATTGATCTGCGCAAAAAAGGCCAAGATCATGGGGTTCGGACACC<br>GCGTGTATAAAGTAAAGGATCCTCGTGCACAAATTTACAAAAATTTAGCAGAGCAGTTATTTGAGAAATTTGG<br>TCACGATCAGTATTATGAAATCGCACTGGAATTAGAGCGTGTAGTCGCTGAACGCCCTGGTCAATAAAGGGAT<br>TTATCCGAACGTCGATTTTTATTCTGGATTGGTATACCGTAAATTAGGCATTCCATCGGATTTATCACTCCG<br>GTATTTGCCATCGCACGCGTGGCAGGTTGGTTGGCCCACTGGAAGAACAATTTGCCAAAAATCGCATCTT<br>CCGTCCAACCCAAATTTATACTGGATCACATAATATGACTTACGTGCCAATCGAAGAACGTCGATTTGGCGAT<br>CGAATCTGAT      |
| ancB k8R, y80F   | ATGACGGCTGTCTCCGAGTTTCTGCTCGACTTGAGGGTGTGCCCGCTACTCTGAGTTCTATTTCTTCTCGT<br>GACGGCCAGCGCGGGATTCTGGAATACCGTGGGATTAGTATTAGCAATTAGCCCAACATTTCGACATTTCTT<br>GAGACAGCGTATTTACTGATTTGGGGTAAACTTCCACCCAAGAGGAATTAGCAGAATTCGAACATGAAATT<br>CGCTACCATCGCCGATCAAGTTCGATTCGATGATGATGAAGTGCCTCCAGAGTCAGGTCACCCAATG<br>GATGCTTTGCAAGCCTCAGCAGCGGCCTTGGGGTGTCTATTTCGCGTGTGCCTGGACGACCCCGAGTA<br>CATCCGTGCGGCAGTTGTGCGTTTACTGGCCAAGATTCCGACAAATGGTTCAGCATTCCAACTTATGCGCAA<br>AGGAAACGACCCGGTACAACCCGCTGATGATCTGGATTATCGCGCTAACTTCTGTACATGTTAAACGAACG<br>TGAGCCAGATCCGCTGGCCGCACGCATCTTCGACGTATGCTTACGCTGCATGCGGAACATACTATCAACG<br>CCTCCACGTTCTCGGCAATGGTAACGGCGTCTACTTTAACTGACCCTTACGCAGTAGTAGCATCGGCTGTAG<br>GGACGTTAGCCGGCCCCGTTACATGGAGGTGCAAACGAGGAGGTTTTGACAAATGTTGGAGGAGATTGGCAG<br>TGTTGAGAACGTCGCTCCGTAAGCATTGATCTGCGCAAAAAAGGCCAAGATCATGGGGTTCGGACACC<br>GCGTGTATAAAGTAAAGGATCCTCGTGCACAAATTTACAAAAATTTAGCAGAGCAGTTATTTGAGAAATTTGG<br>TCACGATCAGTATTATGAAATCGCACTGGAATTAGAGCGTGTAGTCGCTGAACGCCCTGGTCAATAAAGGGAT<br>TTATCCGAACGTCGATTTTTATTCTGGATTGGTATACCGTAAATTAGGCATTCCATCGGATTTATCACTCCG<br>GTATTTGCCATCGCACGCGTGGCAGGTTGGTTGGCCCACTGGAAGAACAATTTGCCAAAAATCGCATCTT<br>CCGTCCAACCCAAATTTATACTGGATCACATAATATGACTTACGTGCCAATCGAAGAACGTCGATTTGGCGAT<br>CGAATCTGAT      |
| Altall ancB      | ATGACGACTGTGTCAGAATTTAAACCGGGATTAGAGGGAGTCCCAGCAACGCTGTCATCCATCTCATACGTC<br>GACGGCCAGAAAGGGATCCTGGAATATCGTGGTATTTCTATCGAGGAGCTTGCTAAACAGAGCACCTTTCTT<br>GAGACAGCTTACTTGCTTATCTGGGAAAACTGCCGACTCAAGACGAATTGACCGATTTCGAACATGAGATC<br>CGTTACCATCGTCGCATCAAAATACCGCATTTCGCGATATGATGAAATGTTTCCCGGAGAGTGGTCACCCGATG<br>GATGCGTTACAAACAAGCGCAGCCGCGTGGGACTGTTCTACTCGCGCCGTGCCCTGGATGACCTGAATA<br>TATCCGCGCTGCGGCTGTGCGCCTGTTGGCTAAGATTCCGACTATGGTGGCTGCATTTCACTTATGCGTAA<br>AGGGAATGACCCGGTCCAGCCACGTGACGATCTGGACTATGCCGCAAAATTTCTTATACATGCTGAACGAGC<br>GTGAGCCCGATCCCTTAGCCGCCCCGATTTTCGATGTGTGCCTGACTTTACATGCGAACAACACTATTAATG<br>CCAGCACGTTCTCAGCTATGGTGACAGCATCCACTTTGACTGACCATACGCTGTGCTGGCATCGGCAGTC<br>GGAACACTGGCAGGTCCCTTCATGGCGCGCTAATGAAGAGGTATTGACGATGTTAGAAGAAATCGGGTC<br>TGTTGAAAATGTACGTCGCTATCTGGATCACTGCATCGCTCGCAAGAGCAAGATCATGGGATTCGGCCACC<br>GTGTATATAAGGTGAAGGATCCGCGCGCTACGATTTTACAGAATTTAGCGGAGCAATTTTGGAGAAATTCG<br>GCCACGATCCATACTATGATATTGCCGTGAGCTTGGAGAAAGTGGTTGCGGAGCGCTTGGGTCACAAAGGG<br>ATCTATCCTAATGTAGACTTTTATAGTGGTTGGTTTATCGTAAACTTGGTATTCCGACTGATCTGTTACTCC<br>CATCTTTGCTATTGCACGCGTGGCGGGATGGTTGGCTCACTGGAAGGAACAGTTAAGTGAAGATCGATCTT<br>TCGCCCGACGCAAAATCTATACTGGATCTCACAAATGCCTTACATCCCATCGAAGAGCGTGATTTGGCGAT<br>CGAATCTGAT  |
| Altall ancB q18L | ATGACGACTGTGTCAGAATTTAAACCGGGATTAGAGGGAGTCCCAGCAACGCTGTCATCCATCTCATACGTC<br>GACGGCCAGAAAGGGATCCTGGAATATCGTGGTATTTCTATCGAGGAGCTTGCTAAACAGAGCACCTTTCTT<br>GAGACAGCTTACTTGCTTATCTGGGAAAACTGCCGACTCAAGACGAATTGACCGATTTCGAACATGAGATC<br>CGTTACCATCGTCGCATCAAAATACCGCATTTCGCGATATGATGAAATGTTTCCCGGAGAGTGGTCACCCGATG<br>GATGCGTTACAAACAAGCGCAGCCGCGCTGGGACTGTTCTACTCGCGCCGTGCCCTGGATGACCTGAATA<br>TATCCGCGCTGCGGTCGTGCGCCTGTTGGCTAAGATTCCGACTATGGTGGCTGCATTTCACTTATGCGTAA<br>AGGGAATGACCCGGTCCAGCCACGTGACGATCTGGACTATGCCGCAAAATTTCTTATACATGCTGAACGAGC<br>GTGAGCCCGATCCCTTAGCCGCCCCGATTTTCGATGTGTGCCTGACTTTACATGCGAACAACACTATTAATG<br>CCAGCACGTTCTCAGCTATGGTGACAGCATCCACTTTGACTGACCATACGCTGTGCTGGCATCGGCAGTC<br>GGAACACTGGCAGGTCCCTTCATGGCGCGCTAATGAAGAGGTATTGACGATGTTAGAAGAAATCGGGTC<br>TGTTGAAAATGTACGTCGCTATCTGGATCACTGCATCGCTCGCAAGAGCAAGATCATGGGATTCGGCCACC<br>GTGTATATAAGGTGAAGGATCCGCGCGCTACGATTTTACAGAATTTAGCGGAGCAATTTTGGAGAAATTCG<br>GCCACGATCCATACTATGATATTGCCGTGAGCTTGGAGAAAGTGGTTGCGGAGCGCTTGGGTCACAAAGGG<br>ATCTATCCTAATGTAGACTTTTATAGTGGTTGGTTTATCGTAAACTTGGTATTCCGACTGATCTGTTACTCC<br>CATCTTTGCTATTGCACGCGTGGCGGGATGGTTGGCTCACTGGAAGGAACAGTTAAGTGAAGATCGATCTT<br>TCGCCCGACGCAAAATCTATACTGGATCTCACAAATGCCTTACATCCCATCGAAGAGCGTGATTTGGCGAT<br>CGAATCTGAT |
| ancC             | ATGGCGGTCTCTGAGTACAAGCCGGGTTTAGAGGGTGTACCTGCGACGCGATCATCTACTCGTTTGTGCA<br>TGGCCAACGTCGGTATCCTGGAATACCGCGGCATTAGCATCGAAGAGCTGGCAAAACACTCGACATTTCTGG<br>AAACTGCTTACTTACTGATTTGGGGTAAATTACCCACACAAGAAAGAACTGGCGGAGTTTGGAGCATTGAGATCC<br>GCTACCATCGTCGCATCAAGTATCCGCGACATGATGAAGTGTTCGCCGAGTCTGGTCACTCCAAATGG<br>ATGCATTACAGGCTTGGCGCGGCTCTGGGTTTATCTATTTCGCGTGTGCTGAGCATTCTGAGTAC                                                                                                                                                                                                                                                                                                                                                                                                                                                                                                                                                                                                                                                                                                                                                                                                                                                                                 |

|             |                                                                                                                                                                                                                                                                                                                                                                                                                                                                                                                                                                                                                                                                                                                                                                                                                                                                                                                                                                                                                                                                                                                                                                                                                                                                   |
|-------------|-------------------------------------------------------------------------------------------------------------------------------------------------------------------------------------------------------------------------------------------------------------------------------------------------------------------------------------------------------------------------------------------------------------------------------------------------------------------------------------------------------------------------------------------------------------------------------------------------------------------------------------------------------------------------------------------------------------------------------------------------------------------------------------------------------------------------------------------------------------------------------------------------------------------------------------------------------------------------------------------------------------------------------------------------------------------------------------------------------------------------------------------------------------------------------------------------------------------------------------------------------------------|
|             | <p>TTCCGCGGGCTGTTGTGCGTCTTTAGCTAAGATTCCGACTATGTTTGCAGCCTTCCAACGTATGCGCAAAG<br/> GAAACGACCCTGTTCAACCTCGTGACGACTTGGACTATGCAGCAAATTTTTGTATATGCTTAATGAGCGG<br/> AGCCAGATCCCTTGGCGGCACGCATTTTCGATGTTTTGCTTAACGTTACACGCTGAGCATACAATCAACGCTT<br/> CTACGTTTTAGTGGCATTGGTACAGCCCTCAACATTGACTGATCCTTACGCGCTCGTCCGCTCAGCGTTGGC<br/> ACCTTTGCGGGCCGTTACATGGGGCGCCAACGAAGAAGTACTTACTATGCTGGAAGAGATCGGGTCTGT<br/> GGAAATGTGCGCCCTATTTGGAGCACTGCATTGCCGCAAGGCAAGATCATGGGTTTTGGTCATCGTG<br/> TTTTCAAAGTAAAGACCCTCGTGCCACCATTTCGAGAACCCTGGCTGAACAATTTTTGAGAAGTTCCGGCC<br/> ACGACCAGTACTACGATATTGCATTAGAACTTGGCGTGTGGTTGCAGAAGCTCTGGGTACAAAGGTATCT<br/> ACCCGAACGTCGATTTCTACTCTGGCCTGGTTACCGTAAACTTGGCATCCCTACCGATTTGTTTACCCCGG<br/> TTTTCGCTATTGCACGCGTGCAGGCTGGCTGGCACACTGGAAGGAACAGCTGTCTGAGAATCGTATTTTC<br/> CGTCCGACACAGATCTATACAGTTCCCATAAACATGCCGTATGTGCCATTGAGGAACGT</p>                                                                                                                                                                                                                                                                                                                                                                                                    |
| ancC q18L   | <p>ATGGCGGTCTCTGAGTACAAGCCGGGTTTAGAGGGTGTACCTGCGACGCTGTCTATCTCGTTTGTGGA<br/> TGCCCAACGTGGTATCCTGGAATACCGCGGCATTAGCATCGAAGAGCTGGCAAACACTCGACATTTCTGG<br/> AAACTGCTTACTTACTGATTTGGGGTAAATTACCCACACAAGAAGAACTGGCGGAGTTTGGCATGAGATCC<br/> GCTACCATCGTCGATCAAGTATCGTATCCGCGACATGATGAAGTGTTCGCCGAGTCTGGTCATCCAATGG<br/> ATGCTTACAGGCTTGGCGCGGCTGTGGTTTTATTCTATTCCGCTCGTGTCTGGACATCATGATGATACA<br/> TTCCGCGGGCTGTTGTGCGTCTTTAGCTAAGATTCCGACTATGTTTGCAGCCTTCCAACGTATGCGCAAAG<br/> GAAACGACCCTGTTCAACCTCGTGACGACTTGGACTATGCAGCAAATTTTTGTATGCTTAATGAGCGCG<br/> AGCCAGATCCCTTGGCGGCACGCATTTTCGATGTTTGTCTAACGTTACAGCTGAGCATACAATCAACGCTT<br/> CTACGTTTGTGCGATGGTACAGCCTCAACATTGACTGATCCTTACGCGCTCGTGCCTCAGCGGTTGGC<br/> ACCTTTGCGGGCCGTTACATGGGGCGCCAACGAAGAAGTACTTACTATGCTGGAAGAGATCGGGTCTGT<br/> GGAAATGTGCGCCCTATTTGGAGCACTGCATTGCCGTAACCTGCCGCAAGGCAAGATCATGGGTTTTGGTCT<br/> TTTCAAAGTAAAGACCCTCGTGCCACCATTTCGAGAACCCTGGCTGAACAATTTTTGAGAAGTTCCGGCC<br/> ACGACCAGTACTACGATATTGCATTAGAACTTGGCGTGTGGTTGCAGAAGCTCTGGGTACAAAGGTATCT<br/> ACCCGAACGTCGATTTCTACTCTGGCCTGGTTACCGTAAACTTGGCATCCCTACCGATTTGTTTACCCCGG<br/> TTTTCGCTATTGCACGCGTGCAGGCTGGCTGGCACACTGGAAGGAACAGCTGTCTGAGAATCGTATTTTC<br/> CGTCCGACACAGATCTATACAGTTCCCATAAACATGCCGTATGTGCCATTGAGGAACGT</p>             |
| Altall ancC | <p>ATGACAGTGTGTAATATAAGCCCGGACTGGAGGGGGTGCCTGCAACTCAATCATCAATCAGTTACGTTGA<br/> CGGTGAGAAGGGCATCTTGGAGTACCGTGGTATTTCAGATTGAGGAATTTGGCAGCATTTCCACCTTTTTGGA<br/> AACAGCATACCTGTTAATCTGGGGAACCTTACCAGCAGGAGGAGCTTACGACTTTGAGCATGAAATCC<br/> GCTATCACCGCGTATCAAATACCGCATTGATGATGATGAAGTCTTCCAGAATCTGGACATCCCATGG<br/> ACGCGCTGCAGACGCTGCCTGCTGCCCTTTGCTTCTACTCGCGTGCCTGCTGAGACACCCAGAGTAC<br/> ATCCGCGCGGCTGTCTGCGCTTGTAGCTAAAATCCAACAATGTTGGCCGCTTCCAGTTGATGCGTAA<br/> AGGTAATGACCCAGTTCAACCTCGCGATGATTTGGACTATGGCGGAATTTCTTTATATGTTAAATGAACG<br/> GAGCCGATCCACTTGGCGCGGATCTTCGACGCTGTGTTAACCTTACATGCTGAACATACGATTAACGCG<br/> AGCATTCTTCTGCCATGTTAACAGCCTCGACATTGACGGACCCTTATGCGGTCGTGGCCTCAGCTGTAGG<br/> AACTCTTCCGGTCTCTTACGCTGGGGTAAAGGAGGTTACTACTATGTTGGAGGAGATGGATCCG<br/> TCGAAACGTCGCTCCGTAACCTGGATAATTGCTGGCCGTAAGCAAAAGATTATGGATCTGGCCACCGC<br/> GTCTACAAGTCAAGGATCCTCGCGGACCATCTTCAAGTCTGGCCGAACAATTTTGAAGAAATTTGGC<br/> CATGATCCGATTTACGACATTGCCATCGAGTTGGAGAAAGTGGTTCCGAGCGCTTGGTCAACAAGGATC<br/> TATCCGAATGTGCACTTCTACTCGGGTGGTGTACCCGAAACTGGGCATCCCAAGCCACTTTTACACC<br/> CATCTTCCGATTTGCACGTTGCTGGGTGGCTTGTCTATTGGAAGGAACAGTTATCCGAGAACCGTATCTT<br/> TCGCCACACAGATCTACACAGGGAGCCACAATATGCCGTATATCCCATTTGAAGAGCGTATTTGGCGA<br/> TCGAATCTGAT</p>          |
| ancD        | <p>ATGGCGGTTGGCGAGTATAAACCCGGCCTGGAAGGTGTACCAGCGACGCAATCTAATATTAGTTTCTGCGA<br/> TGGGCAACGTGGTATCTTGGAAATATCGTGGTATTCTATTGAGGAATTAGCAAAGCACAGTACTTTTTAGAA<br/> ACTGCTATCTTCTGATCTTCCGTAACCTTCCGACACAGGATGAATTAAGGAGTTTCGAGCATGAGATTGCT<br/> CACCATCGCCGATCAAATACCGTATTCCGACATGATTAAGTGTCTCCCTGAGTCCGGCCACCCTATGGAC<br/> GCCCTGCAAACATGTGTCGCTGCTCTTGGACTGTTTACCCGTTACGCGAATTAGATGATCTGACTATATT<br/> CATGGGGCCACGGTACGCTGCTGGCAAAGATCCCAACATGGTGGCTGCATCCACATGCTGCTGCTGAC<br/> GCAATGACCCGTTACGCCCCGCGACGCTTATTACGCGGCAAAATTTCTGTATATGTTGAATGAGAAAG<br/> AACCGGATCCATTAGCCGACGATCTTTCGATGCTGCTTAACTTACGCGAAGCACACGGTCAATGCTT<br/> CTACCTTCCGCTTGGTACTGCTAGTACTTAAACAGATCCATATACGTTTATCCCTTCCGCTCGCGCAC<br/> CCTGTCCGGCCTCTTACGGAGGAGCAATGAACAGGTAATGACCATGTTAGAGGAGATCGGTAGCGTC<br/> GAAATGTCCGTCCTACCTTGGCGCAAGCTTCCGCGTAAGGAAAAATCATGGGATTTGGACATCGTGT<br/> TATAAAGTCAAAGATCCGCGCGCAACCCTTCAAACCTTGGCAGGAGGCTTTTTGACAAATTCGGACAC<br/> GATCCCTACTATGACATCGCGCTTGGCTGGAGCGTGTGGCCGCTGAACGCTGGGCCACAAGGGTATCTA<br/> CCCTAATGTTGACTTTTACTCAGGCCTTGTATATAAAAACTGGGCATTCCAAACCGACTGTTTACTCCAGT<br/> TTCCGCTATTGCTGCTGTCGCGGGTGGCTGGCACACTGGAAGAGCAATTTGATGACAACCCGATCTTTCC<br/> CCCCACCGGCTACTACTGGAGAGCATAACGTACTTACGTTCTATTGCAGAACCGGATTTGGCGATCG<br/> AATCTGAT</p>   |
| ancE        | <p>ATGGCAGACGGCGAATATAAACCCGGCTTAGAGGGTGTACCGGCCACTCGTAGCAATATCAGCTTCTGAGA<br/> TGGTCAAGCAGGGATCCTTGAATATCGTGGTATTCCAATTGAGGAACCTGCTGAACATAGTACGTTCTTGG<br/> GACGGCTTACTTACTGATTTTCGGCAAGTTACCACACAGGATGAGTTAGATGAGTTCGAGCAGGATTCG<br/> TAGCCACCGTGTGCAAAATACCGCATCCGATGATGATTAAGTGTTCAGAAATCCGGCCATCCGATGGA<br/> CGCGTTGCAAACATGCGTGGCTGCATTGGGCCTGTTTACCATTACGTGAGATGGACGATGACGACTATG<br/> TGCAGCGCGCTACAGTACGCTTGGCAAATCCCACTATGGTGGCAATGTTCCATCAAATGCCGCAA<br/> GGGAATGATCCTATCCGCCCCGCTGATGATTTGGATCATGCGGCTAATTTTTGTATATGTTAAACAGGAAA<br/> GAACCTGATCCTCTGGCAGCCCGCATTTTTGATGTTTGTGCTTGCATGCCGAGCACACAGTGAATGCC<br/> AGCATTCTCGGCCTTGGTTACAGCTTCCACCTTAGCTGACCCCTACACAGTATGCTGAGTGGCCGCTTGG<br/> AACCTTTCAGGCCCTGCTGATGGTGGTGAACGAACAAGTGAATGCAAAATGTTAAAGAGATCGGTTCTGT<br/> AGAGAACGTCGCTCCGATATTGAGGAGAAATGGCCCGCAAAGAGAAGATCATGGGGATGGGCCACCGT<br/> GTATATAAAGTGAAGGACCACGCGCCACCATCTTACAGAAGTACGCGGAAGAGTGTTCGACCGTTTCGG<br/> ACATGACCCATATTAGACATCGCTCTGGAAGTAGAGCGCTGTGTGAGGAGTCTGGGTACAAAGGCA<br/> TCTATCCTAATGTTGACTTCTACTCGGGTTAGTCTATTCAAACCTTGGGATCCACGACTTATTTACCCCT<br/> GTATTTCGCAATCGCCCGCTGGCCGGATGGTTGGCACACTGGCGGCAACAATGTCAGACAAACCGTATTTT<br/> TCGCCATCCCAAGTATATACGGGGAACGCAATGCCGTATACACCGTTATCAGAACCGGATTTGGCGAT<br/> CGAATCTGAT</p> |

|                                                                                                         |                                                                                                                                                                                                                                                                                                                                                                                                                                                                                                                                                                                                                                                                                                                                                                                                                                                                                                                                                                                                                                                                                                                                                                                                                                                                                       |
|---------------------------------------------------------------------------------------------------------|---------------------------------------------------------------------------------------------------------------------------------------------------------------------------------------------------------------------------------------------------------------------------------------------------------------------------------------------------------------------------------------------------------------------------------------------------------------------------------------------------------------------------------------------------------------------------------------------------------------------------------------------------------------------------------------------------------------------------------------------------------------------------------------------------------------------------------------------------------------------------------------------------------------------------------------------------------------------------------------------------------------------------------------------------------------------------------------------------------------------------------------------------------------------------------------------------------------------------------------------------------------------------------------|
| <p>CS<br/><i>Methylophaga sulfodovorans</i></p> <p>NCBI Reference Sequence:<br/>WP_091715369<br/>.1</p> | <p>ATGAGCGACTTTCTTCTCGGGCTTGAAGGGGTTCCAGCTACCAAAGCGCAATTTCTTTTCATTGACGGGGAG<br/>AAAGGCATTCTAGCTATCGCGGTTATCTCTGGAGACGCTTGTGAAAATAGCACTTTTCGAGGAAACGACG<br/>CTTCTGCTTTTAGATGGCGAGTTGCCGACGAAAGAGCGCTTAATGACTTTAGCCAGCACTGAAAGGACAAT<br/>TATCGCATCAAGTATCACATTGCCAAATGATCGCTCATTTTCCATACAGGACATCCGATGGATATGCTTC<br/>AGACAGCCGTTCTCTTTAGGCATGTTTTATCCCGGCACTGAATGCCTGACTGACGCCAACTCCTGCGAAG<br/>ACCTGGACTATGTTGCGAATATGACAGTGAATATTATGACAGATGGCCCCATTAGTGGCGATGTGGGAAC<br/>ATATCCGTAATGGATGGGACCTGTTAACCCAAAGCATGACCTTAGCGTCCGCGGCAAGCACTGCTTACATGT<br/>TCAATGGGGAAGAGCCGATCCTCTGATGGCGAAATCATGGATGTGTGCTGATCCTGATGCCGAGCAT<br/>ACACTGAATGCTTCTACCTTTGCCGCTTAGTAGCTGGGTCAACACTGGCGACCCATACTCCGTTATCAGT<br/>GCGCAATCGGGACATTGTCCGGTCCATTGCATGGTGGAGCGAATCAGCGTGTGTTGGCATGCTGCAAGG<br/>AGATTGGGAGCCGGAAGACGTCGAAAGTTGGGTAGACGAAAATTAACAAACAAGGAAGTTATTTGGGA<br/>ATGGTCCACCGCAATATAAGGTCAAGGACCCGCGCGACTATTTGCATAAACTGGTAGAGCAGTTGGT<br/>AGCCGAACGTGGGGTCCCTTACGATATGTTTACACAGCCTTAAACACTGAGGAGGTTTGGCTGATC<br/>GTCTTGGGCACAAAGGCGTTTATCCTAATGTAGACTTTTATTCTGGCATCTTGTATTGCGAAATGGGTATCCC<br/>CGAGGACGAGTTTACGGCTTGTTCGCTGTGGCTCGCAGCGCAGGATGGCTGGCTCATTGGCGTGAACAG<br/>ATTTAGATAATCGTATCTATCGCTACCCAAATCTATGTCCGCTCCGATATGCCGATTACACACCAATCG<br/>AAGAGCGC</p>                              |
| <p>CS<br/><i>Gloeobacter violaceus</i></p> <p>NCBI Reference Sequence:<br/>WP_011143005<br/>.1</p>      | <p>ATGTCAAGGGGATATGTGCCTGGATTAGAAGGCTACCAGCAACACGTTCAAATATCTCGTTTGTGGACGG<br/>AAAAGCAGGTGTGTTAGAGTATCGCGTATTCGGATCCGATCAGTGGCCGAGTCACTACATTTTGAAGAAC<br/>AGCTTTTTGCTGATTTTCGATCATTTCCTACGAAGGACGAATATTGAGCTTGAAGTTGAGTTTTAGGC<br/>CATCGTGTGTAATAATCGCATTCCGCACATGATCAAAAGCTTCCCGAGAGTGGCCGTCCCATGTCGCG<br/>CCTTCAGTTCGATCGCGGCGCTTGGCTTATTTACCCTTGCAGAAACGATAACGCTTCTA<br/>CGATAGTACTATCCGTTTATTAGCTAAAATGCCACCATGGTAGCCACCTTTCATCAAATGCCCTGGGGAA<br/>CGATCCCATCCACCGCATGATTTGGGGCATGCCGAAACTTCTGTATGTGACGGGAAAAGCACT<br/>CGGACCCGCGTGCAGCTCGTATCTTGCATTTGACCTGTGCTGATGTTGCATGCAGAACACAGCTCAATGCTA<br/>CCTTCAGCGCCCTTGTACGGCATCAACTTTGGCAGACCCATACACTGTAATCACCAGTGCGGCAGGAACAT<br/>TGCTCGGGCCCTTGCACGGAGGTGCGAACGAGGAAGTATTTCGATGTTAAAGGAAATCCGCACCATCGAA<br/>CGTGTACGCCATACTTGAATACTGTTAGCTGTAAGAAAAGATCATGGGGCTCGCCACCGCGTATAT<br/>AAGGTGAAAAGACCCACGCGCAACGATTTCTCAAAACTTAGCTCAAGAGCTTTTTGTATCGCTTCCGGCACG<br/>CGTTTTATACGACATTGCCGTGGAAGTGGAGCGCTTTGCGACGAGCTTTGGGTCAAAGGAATCTATCC<br/>GAATGTAGATTTCTATCAGGGTTGGTCTATGAGAAAATGGGGATCCGGCTGATATGTTACACCGCTTTT<br/>GCGATTTCCCGCTCGCCGATGGCTGGCACATTTGGCATGAACAGTTGGCGGACAATCGATTTTCCGCC<br/>AACGCAAGTTTACTGGCAGCCATAACGTGGAGTTCACGCCCTTTCGTTGCGCAGCTACGCA</p>                                                                       |
| <p>CS<br/><i>Pseudanabaena biceps</i></p> <p>NCBI Reference Sequence:<br/>WP_175355653<br/>.1</p>       | <p>ATGGCCATCGGCGAGTATAAACCAGGATTAGAAGGCTGCCCGGACCCAGAGCAACATTTTCATACGTGCGA<br/>CGGAAAAGCGGGCTTCTGGAGTATCGTGGATCCGATCGAAGAATTGTGCGTACACAGTAGTTTTCTTGG<br/>AGACATCATATCTGTTAATCTTTGGTGAGTTACCTACGTCGGCGAAGTTAAAGGAGTTTGAAGTTGATATTAC<br/>CCACCGTCTGCGCATCAAATATCGTATCCGTGATATGATTAATCGTTTTCTGATAACGCACCCCATGGAT<br/>CTGTTGCAAAACAGTGTGGCGGCACTGGCATGTTTTATCCGTTGGGAGATTTCCACGCGGATTTAT<br/>CTATCAGGCGACCGTGCCTGCTTGGCAAAGTGCCCACTATGGTTGCAAGCTTCCATATGATGCGTCAAG<br/>GCAATGATCCAGTTATGCCACGCGACGATCTGGACTATGCGTCAACTTCCCTTACATGCTGAATGAGAAAG<br/>TGCCGGACCCCTTACGCGCGTATCTTTGACGTTTGTCTGACTTTACAGCGGAAACACTGTTAATGCAA<br/>GCACGTTTGGCGGCTTGGTACGGCTTCAACGTTAACGGATCCCTACGCGGTTATTACATCGGCTATCGGA<br/>ACGTTAGCCGGCCACTGCACGGGGGCGCAACGAACAAGTATGATGATGTTGGAGGAAATCGGTCCG<br/>TTGATAATGTTACCGCGTATTAGAACGTAAAGTACGATGCGCAAGGAGAAGCTTATGGGCTTTGGCCCGTA<br/>TTTCAAAGTAAAGGATCCGCGTGTATTGATTGCAAGAGTTAGTCCATAAAATGTTGACCAGTTCCGGACA<br/>TGACCATTACTACGATATCGCCTTGGAGTTAGAGAAAACAGGCATTTGAGAAAATTTCTCAAAGGAAATCCA<br/>CCCGAACGATAGATTTTACTCTGGTTAGTCTACAAGAAGCTTGAATCCCTAGCAACTTTTACCAAGCAATC<br/>TTGCTATCGCCCGTGTGCCAGGTTGGCTTGTCTATTGAAAAGAACAAATGAGTGACAATCGTTTATCCGC<br/>CCGACTCAGGTCTACACGGGCTTCTGATGTTACGTTTACCTATTGAACATCGT</p>                                                        |
| <p>CS<br/><i>Cyanoshece sp. SIO1E1</i></p> <p>GenBank:<br/>NET35916.1</p>                               | <p>ATGACATTCTGTGAATATAAACCCGGGCT?GAAGGAATTCGGCGACCCAAAGTTAGTAAAGTTATGTTGAT<br/>GGTACGCGTGAATCCTGGAGTATCGCGCATCAAATCGAAGCACTTCCGCTAAGTCAAATTTCTTGA<br/>GACAGCCTACTTTTATCTGGGGTGGTTTACCTACTCATGAGGAGTTGGCGTCAATTTGAATCGGAAATTCG<br/>TACACCACCGTCTTTGAAGTACCGTATCCGCGCATGATGAAGTGTCTTCCGGAAAGCGGTCAACCCGATGG<br/>ATAGCCTGCAGGCGTGTGCAGCCGCTGGTCTGTTCTATTGCGTCCGCGACTTGATAACCCTGTTTAT<br/>ATTGCGGCTGCGGTAGTTCGCTGCTTGCAAAATCCCTACTATGGTAGCTGCTTTTCAGATGATGCGCAAA<br/>GGAAATGACCCCATCAACCAGCGGACGATCTGAGCTACTTGCCTTCTGATATGCTTATGCTTATGAACTG<br/>GAAACCGATCCGTTAGCTGCTCACATCTTGCATGTGTCTTACGCTTACGCGGACATACTATCAACGCG<br/>TCAACCTTTCCGCAATGGTACCGCCAGTACACTTACAGATCCCTACGCGGTTGTGCGCTAGCCGTTGGG<br/>TACATTAGCAGGACCCCTTACGAGTGGAGGCGCAATGAAGAGGTTCTTCTATGCTGGAGGAAATTTGAAAGCG<br/>TGGGTAATGTGCCCGGCTACTTGAAGATTGTCTGCAGCGCAAAGCGCGCATTATGGGATTCCGGTACCAGC<br/>GTGTACAAGGTCAAAGATCCACGCGCATTATTCTGCAAGACCTGGCAGAACAGTTGTTGAAAAGCTTGGT<br/>GGCGATCGTTACTACGACATTGCAAGTACAGCTTGAAGCGCAGGTTCTGAAAAATTTGGGCAAAAGGCAAT<br/>CTATCCAAACGTCGACTTTTATCGGGATTGGTCTATCGTAAGTTGGTATTTCCCGCATATGTTACAGCC<br/>GGTCTTCCGCTATTGCCCGTGTGCTGGGTGGTTGGCGCATTGGAAGGAGCAACTTGTGAGAACCAGCATCT<br/>TTGCTCCGACTCAGATCTACACTGGACCTCGCCACATTTATGTAGCTATTGCTGATGCTATCCACCCC<br/>AGGAGGAGGTCATTCTACTAATTTACTTGCAGAT</p> |
| <p>CS<br/><i>Planktothrix mougeotii</i></p> <p>NCBI Reference Sequence:<br/>WP_193869840<br/>.1</p>     | <p>ATGACAGCCGCTCCGAAATCAAACCTGGCCTTGAAGGGGTACCAGCTACACTGTCGTAATTTTCATACGCTG<br/>GATGGGCAAAAGGGTATCCTTGAATATCGTGGCATCTCCATCCAACAGTTGGCTAACTCAACCTTTTTG<br/>GAGACGAGTTATTTAATCTGGGGCAAATACCGACTAAAGACGAAGTGAAGCAATTTGAGCATGAAATT<br/>CGCTATCACCCTCGCATTAAAGTATCGTATTCGATATGATGAAATGTTTTCCGAAACTGGACCCCTAGT<br/>GATGCAATTACAGACGTCGCTGCAGCCTTGGGCTGTTTTATGTCGCGCGCTTTAGACAACCCCGATGA<br/>CATTGCTGAAGCAGTCTGTTGTTTGGCAAAAATCCCAACTATGGTCCGCGCCTTCCAATTAATGCGCAA<br/>AGGAAACGATCCAGTGAACCCGCGGATGACCTTACTACTAGCTAATTTCTTATATGTTGCTGACGCG<br/>TGAGCCAGACCCCTTCCGCGTGGTTTTGACGCTTTGCTTACGCTTACGCGTACGCGAACACAATCAATG<br/>CAAGTACATTACGCGCAATGGTACAGCTAGTACTTTGACGGATCCTTATGCAGTCATTGCTTACGAGTAG<br/>GCACATTAGCCGGTCCGTTGACGCGTGGGCTAACGAGGAGGTTAGTAAATGCTGGAGGAAATTTGGGG<br/>AGTTGAGAACGTTGGTCTTATGGATAACTGATTGCAAGAAAAGTAAATCATGGGATTTGGCCATCG<br/>CGTTTATAAAGTTAAAGACCCTCGTGTACAATTTTGAACAGTTAGCTGAGAAGCTGTTGAGAAGTTTGG<br/>GCATGACCAGTACTATAAATGCTTGAACCTTGAAGGAGTCAAGCGGACCTTATAGTGGGAAAGTTGGG<br/>TCTATCCGAATGTGACTTCTATAGTGGCTGGTACCAGGAGTTGGAAATCCCGCTGACTTACTTACCTC<br/>CGATCTCCGCTATCGCCCGTGTGAGTGGGTGGCTGGCTCATTGAAAAGAGCAATTAACAAAAATCGCATCT</p>                                                                                                                                  |



|                                                                                                     |                                                                                                                                                                                                                                                                                                                                                                                                                                                                                                                                                                                                                                                                                                                                                                                                                                                                                                                                                                                                                                                                                                                                                                                                                                                                                |
|-----------------------------------------------------------------------------------------------------|--------------------------------------------------------------------------------------------------------------------------------------------------------------------------------------------------------------------------------------------------------------------------------------------------------------------------------------------------------------------------------------------------------------------------------------------------------------------------------------------------------------------------------------------------------------------------------------------------------------------------------------------------------------------------------------------------------------------------------------------------------------------------------------------------------------------------------------------------------------------------------------------------------------------------------------------------------------------------------------------------------------------------------------------------------------------------------------------------------------------------------------------------------------------------------------------------------------------------------------------------------------------------------|
|                                                                                                     | TTCGCCCAACTCAAATCTATACGGGCGAGTCACAATGAGACTTATGTGCCATCCATGAGCGTAATTGTGCAA<br>TTAACCTGAAGAATCAACGTTG                                                                                                                                                                                                                                                                                                                                                                                                                                                                                                                                                                                                                                                                                                                                                                                                                                                                                                                                                                                                                                                                                                                                                                             |
| <b><i>Δ2-6 CS<br/>Planktothrix<br/>mougeotii</i></b>                                                | ATGTTCAAACCTGGCCTTGAGGGGGTACCAGCTACACTGTCGTCAATTTACACGTGGATGGGCAAAGGG<br>TATCCTTGAATATCGTGGCATCTCCATCCAACAGTTGGCTAATTACTCAACCTTTTTGGAGACGAGTTATTTAT<br>TAATCTGGGGCAAATTACCGACTAAAGACGAACTGGAAGCATTGAGCATGAAATTCGCTATCACCGTCGCA<br>TTAAGTATCGTATTCGTGATATGATGAAATGTTTTCCGGAAACTGGACACCCTATGGATGCATTACAGACGTC<br>CGCTGCAGCCTTGGGCCTGTTTTATAGTCGCGCGCTTTAGACAACCCCAAGTACATTCTGTAAGCAGTCG<br>TTCGTTTTGTGGCAAAATCCCAACTATGGTCGCGCCTTCCAATTAATGCGCAAAGGAAACGATCCAGTGC<br>AACCGCAGGATGACCTTGATTACTCAGCTAATTTCTTATATATGTTGTCTGAGCGTGAACAGACCCCTTG<br>CCGCGTGGGTTTTGACGTTTTGCCTTACGCTTACGCGGAACACACAATCAATGCAAGTACATTACGGCAA<br>TGGTCACAGCTAGTACTTTGACGGATCCTTATGCAGTCATTGCTTACGAGTAGGCACATTAGCCGGTCCGT<br>TGCACGGTGGGGCTAACGAGGAGGTGTTAGTAATGCTGGAGGAAATGGGGCAGTTGAGAACGTTGGTCC<br>TTATGTGGATAACTTGATTGCCAAGAAAAGTAAAATCATGGGATTTGGCCATCGCGTTTTATAAAGTTAAAGAC<br>CCTCGTGCTACAATTTGCAACAGTTAGCTGAGAAGCTGTTGAGAAGTTTGGGCATGACCAGTACTATGAA<br>ATTGCCTTGGAACTTGAAAAAGTCGTAGCGGACCGTTTAGGTGGGAAGGGGATCTATCCGAATGTCGACTT<br>CTATAGTGGCCTGGTGTACCACAAGTTGGGAATCCCGCTGACTTATTTACTCCGATCTTCGCTATCGCCCG<br>TGTGAGTGGGTGGCTGGCTCATTGAAAGAGCAATTAACAAAAATCGCATCTTTGCCCCAACTCAAATCTA<br>TACGGGCAGTCAATGAGACTTATGTGCCTATCCATGAGCGTAATTGTGCAATTAACCTTGAAGAATCAAC<br>GTTG                              |
| <b><i>CS Cyanobium<br/>sp. PCC7001</i></b><br><br>NCBI Reference<br>Sequence:<br>WP_006910478<br>.1 | ATGGCCGGGAGCTTGAGTGATAGTGTACCTGGATCGACTGGAGGGGCAACGGCTGCCCCACCATTTTCGTC<br>CCGGGTTGGAAGGTGTACCAGCAACTCAGAGCGCGATCTGTGACATTGATGGACAAAAGGGTCGTTTTAACA<br>TACCGCGGTACGACGCGGGGAGCTGGCCGCTCATAGCACGTTCTTGAAACAACCTACTTATTAATTTG<br>GGGAGAGCTTCCCACCGCCGAAGGTTGCGTCAGTTTGAACACGAGGTTGAGATGCATCGCCGTGTTTCCCT<br>TCCGTATTCGTGACATGATGAAATGCTTCCCGCTACAGGCCATCCCATGGATGCATTGCAGTCGTCCGCC<br>GCCAGCTTGGGTCTGTTTTATCCCGCCTGCGCTGGACAATCCCGAGTATATTGCAGAAGCGGTGGTACG<br>CTTAATTGCCAAAATCCCACTATGGTAGCAGCCTTCCAACCTGATTGCAAGGGCCAGGATCCGATCCAACC<br>GCGCGAGGATCTTCCATTGCGCTCGAACTTTCTTTACATGCTGACTGAGCAGGAACCTGATCCTCTGGCGG<br>CTCGCATCTTCGATGCATGTCTGATCTTACATGCTGAGCATTCTGAACGCAAGCACGTTCTCGGCGCGCG<br>TCACTGCTTCTACTTTGACTGACCCCTACGCCGTCGTGGCGAGCGCAGTTGGCACGTTGGCTGGCCCACTG<br>CACGTTGGCGCAAACGAGGATGTCTGGCCATGTTGGAGGCTATCGGGAGTGCAGACCAGGTGGAACCGT<br>GGTTGGACCGTGCAATCGCCAGAAACAAAAGATTATGGGTTTTGGTCATCGCGAGTACAAGGTGAAAGAC<br>CCTCGCGCGTGATTTTACAGGGCTTAGCGGAACAGCTTTTCCACCCTTTGGGGCACGACCCCTTGATGA<br>CTTAGCGCGTAAACTGGAAGAAGCTGCGGCAGAACGCTTAGGCCGAAAGGTATCTACCCGAACGTAGATT<br>TTTATCCGGCTTGGTCTACCGTAAGTTAGGGATCCCGCGCATCTTTTACACCTATTTTTGCCATCGCCCG<br>CACAGCAGGTTGGCTTGCCTGCACTGGAAGGAGCAATTAGGTGCAAAACCGCATCTTCCGTCATCACAGATCT<br>ACACAGGACCTGTACCCCGCGACTGGGTCCCTTGAAGCCGT |

Supplementary table 3 List of homology cassettes used for transformation of *S. elongatus*

PCC7942

| CS variant       | DNA sequence full homology cassette                                                                                                                                                                                                                                                                                                                                                                                                                                                                                                                                                                                                                                                                                                                                                                                                                                                                                                                                                                                                                                                                                                                                                                                                                                                                                                                                                                                                                                                                                                                                                                                                                                                                                                                                                                                                                                                                                                                                                                                                                                                                                                                                                                                                                                                                                                                                                                                                                                                                                                                                                                                                                                                                                                                                                                                                                                                                                                                                                                                                                                                                                                                                                                                                                                                                                                                                                                                                                                                                                                                                                                                                                                                                                                                                                                                                                                                                                                                                                                                                                                                                                                                                                                                                                                                                                                                                                                                                                                                                                                                                                                                                                                                                                                                                                                                                                                                                                                                                                                                                                                                                                                                                                                                                                                                                                                                                                                                                                                                                                                                                                                                                                                                                                                                                                                                                                                                                                                                                                                                                                                                                         |
|------------------|-------------------------------------------------------------------------------------------------------------------------------------------------------------------------------------------------------------------------------------------------------------------------------------------------------------------------------------------------------------------------------------------------------------------------------------------------------------------------------------------------------------------------------------------------------------------------------------------------------------------------------------------------------------------------------------------------------------------------------------------------------------------------------------------------------------------------------------------------------------------------------------------------------------------------------------------------------------------------------------------------------------------------------------------------------------------------------------------------------------------------------------------------------------------------------------------------------------------------------------------------------------------------------------------------------------------------------------------------------------------------------------------------------------------------------------------------------------------------------------------------------------------------------------------------------------------------------------------------------------------------------------------------------------------------------------------------------------------------------------------------------------------------------------------------------------------------------------------------------------------------------------------------------------------------------------------------------------------------------------------------------------------------------------------------------------------------------------------------------------------------------------------------------------------------------------------------------------------------------------------------------------------------------------------------------------------------------------------------------------------------------------------------------------------------------------------------------------------------------------------------------------------------------------------------------------------------------------------------------------------------------------------------------------------------------------------------------------------------------------------------------------------------------------------------------------------------------------------------------------------------------------------------------------------------------------------------------------------------------------------------------------------------------------------------------------------------------------------------------------------------------------------------------------------------------------------------------------------------------------------------------------------------------------------------------------------------------------------------------------------------------------------------------------------------------------------------------------------------------------------------------------------------------------------------------------------------------------------------------------------------------------------------------------------------------------------------------------------------------------------------------------------------------------------------------------------------------------------------------------------------------------------------------------------------------------------------------------------------------------------------------------------------------------------------------------------------------------------------------------------------------------------------------------------------------------------------------------------------------------------------------------------------------------------------------------------------------------------------------------------------------------------------------------------------------------------------------------------------------------------------------------------------------------------------------------------------------------------------------------------------------------------------------------------------------------------------------------------------------------------------------------------------------------------------------------------------------------------------------------------------------------------------------------------------------------------------------------------------------------------------------------------------------------------------------------------------------------------------------------------------------------------------------------------------------------------------------------------------------------------------------------------------------------------------------------------------------------------------------------------------------------------------------------------------------------------------------------------------------------------------------------------------------------------------------------------------------------------------------------------------------------------------------------------------------------------------------------------------------------------------------------------------------------------------------------------------------------------------------------------------------------------------------------------------------------------------------------------------------------------------------------------------------------------------------------------------------------------------------------|
| Wildtype<br>SeCS | <p>GGCAGCAAACGCCGCAATCTCCAGATTCAAGCCACAGTACGGGGTGGCCATGGTCGCGATGGTGATTTTGAAGT<br/>                     GTTTGCCACCTCCCTCGATCGCCTTGCGACAGCACTCGAAGGCCGCGATTCCCTGACGACAAATCTGACTTCC<br/>                     GCCAAGCCCAGCGCCAACACTACCCCAACCCAATCAAGGTGTCTCTACCTTGACTGGCAGGCCAGTGCCTTACC<br/>                     GCTGACGCAACGCTGGCCTGTCTTGACAGCTGATTGCCCTGCCCTTGAACCCCTGTTGGAGCAGCTGCAGGCG<br/>                     ATCGCGATCGCCAGTCTACCCCTCCCGAAGACAGCACTGACCTGCAGCGACTCTAATCGAAGTCTGTTGGC<br/>                     GAGCTAGGCGATGGAAGTCTATCTGATCCGCCATGGCATCGCCGCCAAGCGGGGACCTACGCGGATGATGAC<br/>                     CGCGCCCCCTGACAGCCACGGGAGAAGCCCGCAGTCAACGAGTTGCCAGCGACTGCTGTCTCGGTCTGCG<br/>                     ATTTCCGATGTTCTGCAAACCAAGTCCCCTAGTCCGCGCCCAACCCGCGTCTATCCTTCAACAAGAGGGGCTG<br/>                     GCTTCCCAAAATCGCGATCGCCCCAGAATTAGCGCCCGAAGGCAGTCTGACCGCTTGGCTCCGGCGCTTACCGC<br/>                     CCGCCATCTCGGCTGATCAGCGCTGGGCGATCGTGGGCCATGAACCCGATCTAGGGGTCTGGCGGAACAGCT<br/>                     GGCTGGGGATCTGCCAGGACAAGCTCGTTCTCAAGAAAGCCGGTCTGATCGGTCTGCAATCCCAGGCGATC<br/>                     GCCTGCGATCGGAGCCGATCCCTCTTCTGGCTAACCCCCCGCGCTTCTCCTTTAGGGGACCTGATCAAA<br/>                     TTGGCGAAAGACGCGCGGCAGACCCACCATCAGGTTTCGTGCCTGTTGCGACGAAGATGACACCCAGACTG<br/>                     ATAGGGTATTCGGAAGAAAGACTGCATGGGAAGCCAGGATTGACTGCGCTCAGCAGGATTTCCGCTG<br/>                     GCCTAGAAGCGGTGCCCGCCACACTCTCGAGCATTAGCTTTGTCGATGGCCAGCGCGGGCTCTAGAGTATCG<br/>                     CGGCATCAGCATCGAACAATGGCGCAACAGAGCAGTTTTCTGGAACCCGCTACCTGTTGATTTGGGGCCATC<br/>                     TACCAACTCAGCAGGAATTGACCGAGTTGAGCAGCAAATTCGCTACCACCGCCGATCAAGTCCCAGCTCCG<br/>                     GACATGATGAAATGCTTCCCGATAGCGGCCATCCCTATGGATGCCCTGCAGCGAGCGCCAGCCCTCGGGT<br/>                     TGTTCATTCCGCGCGCGCTTGGATGATCCCGAATACATTCCGGCGGGCGTGTGCGTTTGTAGCCAAAATT<br/>                     CCGACGATGGTGGCTGCCCTCCAGTGTACCGCAAGGTAACGACCAATTCAGCCCCGATGAACTGGACT<br/>                     ACGCCGCCAATTTCTCTACATGCTGACGGAGCGCGAGCCGATCCAGTGCAGCTCGGATTTTTGATTTTGC<br/>                     CTCACCCTGCACGCCGAACATACGATCAACGCCTCGACCTTCTCGCGGATGTTACAGCTTCCAGCCCTGACCGA<br/>                     TCCCTACGCTGCTGTTCTCCGTTGGCACCTTGGCTGGCCCCCTCCATGGCGCGCAATGAAGAAGTG<br/>                     CTGGACATGCTGGAGGCGATCGGTTCCGTCGAGAATTGAGCCCTACCTCGACCACTGCAATGCCACCAAAAC<br/>                     GCGCATTATGGGCTTTGGCCACCGTGTCTACAAAGTCAAGGATCCGCGGGCAGTCACTTGCAAAATCTGGCCG<br/>                     AGCAACTGTTGATATCTTCGGCCATGATCCCTACTACGAAATCGCGTGCAGTTCGAAAAGGCAGCAGCCGAG<br/>                     GCACTCAGCCACAAGGGCATTACCCCAACGTCGATTTCTACTCCGGCTTGGTCTATCGCAAGCTCGGATTTCT<br/>                     AGCGATCTATTACACCGGTGTTTGGCATCGCGCGGGTTCGGGGCTGGCTCGCCCACTGAAAAGAGCAGCTGA<br/>                     ACGAAAATCGGATCTTCGGCCCCACTCAGATCTACCGGGCAGCCACAACCTCGACTACACCCCGATCGCCGAT<br/>                     CCGGATTTGGCGATCGAATCTGATTGATCTAGATAATCCCTACGCGATCGCAAGTTCGAAAAGTTGCTACAACAA<br/>                     TATCCAAGCATCAAAAAGCGCCCAATTCGAGGGCGTTTTTATTATTCAGACTGCTGTAATTCGGGCAATTAGGTT<br/>                     ATTTGCCGACTACCTTGGTGTCTCGCCTTTCACGTAGTGGACAAATTTCTCAACTGATCTGCGCGCGAGGCCA<br/>                     AGCGATCTTCTTTGTCGAAGATAAGCCTGTCTAGCTTCAAGTATGACGGGCTGATACTGGCCGCGAGGCGC<br/>                     TCCATTGCCAGTTCGGCAGCGACATCTTCGGCGCGATTTTCCGGTTACTGCGCTGTACCAAAATGCGGGACAA<br/>                     CGTAAGCACTACATTTGCTCATCGCCAGCCAGTTCGGCGGGCAGTTCATAGCGTTAAGGTTTCAATTTAGCG<br/>                     CCTCAAAATAGATCCTGTTAGGAACCCGATCAAGAGTTCCTCCCGGCTGGACCTACCAAGGCAACGCTATGT<br/>                     TCTCTTGTCTTTGTAGCAAGATAGCCAGATCAATGTGATCGTGGCTGGCTCGAAGTACCAGCAAGAAATGTC<br/>                     TTGGCTGCCATTCTCAAAATTCAGTTCGCGCTTAGCTGGATAACGCCACGGAATGATGTCGTGTCGACACA<br/>                     AATGGTGACTTCTACAGCGCGGAGAATCTCGCTCTCTCCAGGGGAAGCCGAAATTTCCAAAAGTTGCTACAAC<br/>                     AAGCTCGCGCGTGTGTTTCATCAAGCCTTACGGTACCCGTAACAGCAAAATCAATATCACTGTGTGGCTCAGGC<br/>                     CGCCATCCACTGCGGAGCCGTACAATGTACGGCCAGCAACGTCGGTTTCGAGATGGCGCTCGATGACGCCAAC<br/>                     TACCTCTGATAGTTGAGTTCGATACCTTCGGCGATCACCCTTCCCTCAATAATGTTTAACTTTGTTTAGGGCAGT<br/>                     CCCTGCTGCGTAACATCGTTGCTGCTCCATAACATCAACATCGACCCAGGGCGTAACCGCTTGGCTGCTTGG<br/>                     TGCCCCGAGGCATGACTGTACCCCAAAAAAACAGTCATAACAAGCCATGAAAACCGCCACTGCGCGCTTACCAC<br/>                     CGCTCGCTTGGTCAAGTTTCGAGCCAGTTTCGTCGAGCGCATACGCTACTTGCATTAAGGATTCGAAACCGGAA<br/>                     CAGGCTTATGTTCACTGGTTCGTGCTTTCATCCGTTTCCACGGTGTGCGTCAACCGCAACCTTGGGTAGCAG<br/>                     CGAAGTCGAGGCAATTTCTGCTGCTGGCTAGGCTTAGGCTTTGGGATAGGCGATAGTAACGCCGTTGCCCC<br/>                     GTCAGCTTGCAGCGAGCTTCAAATTCGCGACAAGTGGATGCTCGCGTAGGAAGTCTGACCGCTTGCAGCGCA<br/>                     GTTTGCCAGTGCATGGCCATGGATGATCCAGATCGGTCCAATCGTTGACGCGAGCGATCTCCAGCACCACT<br/>                     TCGGCTTCCGAAACAGCACTGCCGCGTACATCGAAGGATTGCGATCGGTGCGAATCGCCGGCGCATCTTTGG<br/>                     CCGGGGCGGGGAGTTGTTGACTTAGCGGGGGCGGGGCGAGTTCTACCTTTTCGCCCTGCAATGACTCCAC<br/>                     ATCGCCGTAGCTGACCGTACGTTGAGGATGCCGCAACGACCGTAACTCCTGACGATCCGGCGCGATCGCA<br/>                     AGGACTTCCGCGACCTTACCAAGCGCGGAATCCGCGAGGCGATCGCCAACTGCGGCTGGAACACAGGCGGT<br/>                     GGGGCAACGACCGTACGGCTGGTTGTGACAGCGACTTGAGGGTTTCACTGGCCTGCCGTGCTGTTCTGCTT<br/>                     TTGTGCTTTTCCGCTGCTGACAGCGCCGACCACTTGGCAACCGCTGCTGCTGCTCAATTTCCGAC<br/>                     TGATCGCCACTTCTGCTGCTGGCGCAAGCTTTGCTCTGCTCCGCAATTCGGCTGCTTTGGCTGTAGTTTC<br/>                     GGCGTGTAGCTTTTCACTGTTGCAACAACAGCAGCGGGCGGCAAGCTTCTTCTTGTAGCAGCGCCGTTGCG<br/>                     CTTCCAGCCCTGCGATCAGGCATCTACATCGGATCGCGGCCCTTCCAGTTGCGATCGCGCTCAGCTAC<br/>                     GACTGCTGGTGTAGTCCAGTCCGCTCGGCAATGATCAGCGCATTGATCGCCCGGGGATGCCCGAGGCAAG<br/>                     CGATAGGTCGGAGAGGGTGCATCGTCAAATTTACCGAGGCATTTTCGAAGCGATGTCCTGATATTTACAG<br/>                     GGCCT</p> |
| L18q SeCS        | <p>GGCAGCAAACGCCGCAATCTCCAGATTCAAGCCACAGTACGGGGTGGCCATGGTCGCGATGGTGATTTTGAAGT<br/>                     GTTTGCCACCTCCCTCGATCGCCTTGCGACAGCACTCGAAGGCCGCGATTCCCTGACGACAAATCTGACTTCC<br/>                     GCCAAGCCCAGCGCCAACACTACCCCAACCCAATCAAGGTGTCTCTACCTTGACTGGCAGGCCAGTGCCTTACC<br/>                     GCTGACGCAACGCTGGCCTGTCTTGACAGCTGATTGCCCTGCCCTTGAACCCCTGTTGGAGCAGCTGCAGGCG<br/>                     ATCGCGATCGCCAGTCTACCCCTCCCGAAGACAGCACTGACCTGCAGCGACTCTAATCGAAGTCTGTTGGC<br/>                     GAGCTAGGCGATGGAAGTCTATCTGATCCGCCATGGCATCGCCGCCAAGCGGGGACCTACGCGGATGATGAC<br/>                     CGCGCCCCCTGACAGCCACGGGAGAAGCCCGCAGTCAACGAGTTGCCAGCGACTGCTGTCTCGGTCTGCG<br/>                     ATTTCCGATGTTCTGCAAACCAAGTCCCCTAGTCCGCGCCCAACCCGCGTCTATCCTTCAACAAGAGGGGCTG<br/>                     GCTTCCCAAAATCGCGATCGCCCCAGAATTAGCGCCCGAAGGCAGTCTGACCGCTTGGCTCCGGCGCTTACCGC<br/>                     CCGCCATCTCGGCTGATCAGCGCTGGGCGATCGTGGGCCATGAACCCGATCTAGGGGTCTGGCGGAACAGCT<br/>                     GGCTGGGGATCTGCCAGGACAAGCTCGTTCTCAAGAAAGCCGGTCTGATCGGTCTGCAATCCCAGGCGATC</p>                                                                                                                                                                                                                                                                                                                                                                                                                                                                                                                                                                                                                                                                                                                                                                                                                                                                                                                                                                                                                                                                                                                                                                                                                                                                                                                                                                                                                                                                                                                                                                                                                                                                                                                                                                                                                                                                                                                                                                                                                                                                                                                                                                                                                                                                                                                                                                                                                                                                                                                                                                                                                                                                                                                                                                                                                                                                                                                                                                                                                                                                                                                                                                                                                                                                                                                                                                                                                                                                                                                                                                                                                                                                                                                                                                                                                                                                                                                                                                                                                                                                                                                                                                                                                                                                                                                                                                                                                                                                                                                                                                                                                                                                                                                                                                                                                                                                                                                                                                                                    |

GCCCTGCGATCGGAGCCGGATCCCTCTTCTGGCTAACCCCGCGCCTTCTCCTTTAGGGGCACCTGATCAAA  
TTGGCGAAAGACGCGCGGCAGACCCACCATCAGTTTTCTGTCCTGTTGCGACGAAGATGCACCAGCCAGACTG  
ATAGGGTATTCGGAAGAAAGACTGCATGGGGAAGCCAGGATTGCTATGACTGCCGTGAGCGAGTTTCGGCCTG  
GCCTAGAAAGCGTGCCCGCCACACAGTCGAGCATTAGCTTTGTCGATGGCCAGCGCGGCGTCTAGAGTATCG  
CGGCATCAGCATCGAGCAACTGGCGCAACAGAGCAGTTTTCTGGAACCGCCTACCTGTTGATTTGGGGCCATC  
TACCAACTCAGCAGGAATTGACCGAGTTGAGCAGCAAATTCGCTACCACCGCCGATCAAGTTCCGCATCCGG  
GACATGATGAAATGCTTCCCGATAGCGGCCATCCTATGGATGCCCTGCAGGCGAGCGCCGAGCCTCGGGT  
TGTTCTATTCGCGCGCGCCTTGGATGATCCCGAATACATTGGGGCGGCGTTGTGCGTTTGTAGCCAAAATT  
CCGACGATGGTGGCTGCCCTCCAGCTGATCCGCAAGGTAACGACCCAAATTCAGCCCGCGATGAACTGGACT  
ACGCCGCCAACTTTCTCTACATGCTGACGGAGCGCGAGCCCGATCCAGTCGCAGCTCGGATTTTTGATTTTGC  
CTCACCTGCACGCCGAACATACGATCAACGCCTCGACCTTCTCGGCGATGGTCACAGCTTCGACCCTGACCGA  
TCCTACGCTGTGCTTGTCTGCCGTTGGCACCTGGCTGGCCCCCTCCATGGCGGCGCCAATGAAGAAGTG  
CTGGACATGCTGGAGGCGATCGGTTCCGTCGAGAATGTTGAGCCCTACCTCGACCCTGCATTGCCACCAAAAC  
GCGCATTATGGGCTTTGGGCACCGTGTCTACAAAGTCAAGGATCCGCGGGCAGTCATTCTGCAAAATCTGGCCG  
AGCAACTGTTTCGATATCTTCGGCCATGATCCCTACTACGAAATCGCGGTGCGAGTCGAAAAGGCGAGCCGG  
CGACTCAGCCACAAGGGCATTACCCCAACGTCGATTTCTACTCCGGCTTGGTCTATCGCAAGTCCAAAGTTGTC  
AGCGATCTATTCACACCGGTTGTTGCGATCGCGCGGGTTCGCGGGCTGGCTCGCCACTGGAAGAGCAGCTGA  
ACGAAAATCGGATCTTCGCCCCACTCAGATCTACACGGGCGAGCCACAACCTCGACTACACCCCGATCGCCGAT  
CGGGATTTGGCGATCGAATCTGATTGATCTAGATAATCCCTAGCGATCGCAAGTCCAAAGTTGTCACAA  
TATCCAAGCATCAAAAAGCGCCCATTCGAGGCGCTTTTTGATTATTCAGACTGCTGTAATTCGGCAATTAGGTT  
ATTTGCCGACTACCTTGGTGTCTCGCCTTTCACGTAGTGGACAAATTTCTTCAACTGATCTGCGCGCGAGGGCA  
AGCGACTTCTTCTTGTCCAAGATAAGCCTGTCTAGCTCAAGTATGACGGGCTGATACGGCGCGGCGGCGC  
TCCATTGCCAGTCGGCAGCGACATCCTTCGGCGGATTTTGGCGTTACTGCGCTGTACCAAAATGCGGGACAA  
CGTAAGCACTACATTTGCTCATCGCCAGCCAGTCGGGGCGGCGAGTTCCATAGCGTTAAAGTTTCAATTTAGCG  
CCTCAAAATAGATCCTGTTCAAGAACCGGATCAAGAGTTCTCCTCCGCGCTGGACCTACCAAGGCAACGCTATGT  
TCTCTTGTCTTTGTCAGCAAGATAGCCAGATCAATGTCGATCGTGGCTGGCTCGAAGTACCAGCAAGATGTCA  
TTGCGCTGCCATTTCTCAAAATTCAGTTTCGCGCTTAGCTGGATAACGCCACGGAATGATGTCGTGTCACAAC  
AATGGTGACTTCTACAGCGCGGAGAATCTCGCTCTCTCCAGGGGAAGCCGAAGTTTCCAAAAGGTCGTTGATCA  
AAGCTCGCGCGTGTGTTTCATCAAGCCTTACGGTACCCGTAACCAGCAAATCAATATCACTGTGTGGCTTCAGGC  
CGCCATCCACTGCGGAGCCGTACAATGTACGGCCAGCAACGTCGGTTGAGATGGCGCTCGATGACGCCAAC  
TACCTCTGATAGTTGAGTCGATACTTCGGCGATCACCGCTTCCCTCAATGTTTAACTTTGTTTTAGGGCGACTG  
CCCTGCTGCGTAACATCGTTGCTGCTCCATAACATCAAACATCGACCCACGGCGTAACGCGCTTGTGCTTGA  
TGCCCGAGGCATAGACTGTACCCCAAAAAACAGTCATAACAAGCCATGAAAACCGCCACTGCGCCGTTACCAC  
GTCAGCTTTCGGTCAAGGTTCTGGACCAGTTGCGTGAGCGCATACGCTACTTGCAATTACAGTTACGAACCGAA  
CAGGCTTATGTCCACTGGGTTCTGTCCTTCCGTTTCCACGGTGTGCGTCACCCGGCAACCTTGGGTAGCAG  
CGAAGTCGAGGCATTTCTGTCCTGGCTGGCTAGGCTTAGGCTTGGGATAGGCGATAGTAACGCCGTTGCCCC  
GTGAGCTTATCGGCAGCTTCAAACCTCGCGACAAGTGGATGCTCGCGTAGGAAGTCTGCAAGCCTTGGCCGCA  
GTTTGCCAGTGCCATGGCCATGGATGATCCAGATCGGTCCAATCGCTTGACGCAGCGCATCTCCAGCACCCT  
TCGGCTTCCGAAACACGACTGCCGCTACATCGAAGGTAATGCGATCGGTGCGAATCGCCGGCGCATCTTTGG  
CGGGGGCGGCGGAGTTGTTGACTTAGCGGGGGCGGGCAGTTCTACCTTTTCGCCCTGCAATGACTCCAC  
ATCGCCGTAGCTGACCGTCAGCTTGAAGGATGCCGCAACGCACCGTTAACTCCTGACGATCCGGGCGGATCGCA  
AGGACTTCGCGGACTTACCCAAGCGCGGAATCCGCAGGCGATCGCCCAACTGCGGCTGGAACCAGCGGGT  
GGGCAACGACCGTCAAGGCTGTTGTGACAGCGACTTGAAGGTTTCACTGGCCTGCCGTGCTGCTTCTGCTT  
TTGTCGCTTTCCGGTCCCTGCTGACAGACGCCGACCCACTTGGCAACCCGCTGTGCTGCTGCTCAATTTCCGAC  
TGGATCGCCACTTCTGCTGCTGGCGCAAGCTTTGCTCTCGCTCCGCAATTCGGCTGTCTTGGCTTGTAGTTC  
GGCGTGTAGCTTTTCACTGTTGCAACAACAGTGAAGCGGGCGGCGAGCCTTCTTCTTGTGATCGCGCCGTTGCG  
CTTCCAGCCCTGCGATCAGGCATCTACATCGCGATCGCGGCCCTTCCAGTTGCGATCGCGCCTCAGCTAC  
GACTGCTGGTGTAGTCCAGTCTCGGCAATGATCAGCGCATTGATCGCCCGGGGATGCCCAAGAGCAAG  
CGATAGTTCGGAGAGGGTGGATCGTCAAATTCACCGAGGCATTTTCAAGCGATGTCCTGATATTCAG  
GGCCTT
